# Supplementary material for: Joint effects of pregnancy, sociocultural, and environmental factors on early life gut microbiome structure and diversity
Source: PubMed Central journal article supplement (PMC4997337; doi:10.1038/srep31775), 2016-08-25
Supplement: srep31775-s1.pdf [file srep31775-s1.pdf]

Joint effects of pregnancy, sociocultural, and environmental factors on early life gut microbiome structure and diversity.

Albert M. Levin<sup>1,2\*</sup>, Alexandra R. Sitarik<sup>1\*</sup>, Suzanne L. Havstad<sup>1</sup>, Kei E. Fujimura<sup>3</sup>, Ganesa Wegienka<sup>1</sup>, Andrea E. Cassidy-Bushrow<sup>1</sup>, Haejin Kim<sup>4</sup>, Edward M. Zoratti<sup>4</sup>, Nicholas W. Lukacs<sup>5</sup>, Homer A. Boushey<sup>6</sup>, Dennis R. Ownby<sup>7</sup>, Susan V. Lynch<sup>3†</sup>, Christine C. Johnson<sup>1†</sup>

<sup>1</sup> Department of Public Health Sciences, Henry Ford Health System, Detroit, MI, 48202;

<sup>2</sup> Center for Bioinformatics, Henry Ford Health System, Detroit, MI, 48202;

<sup>3</sup> Division of Gastroenterology, Department of Medicine, University of California, San Francisco, CA, 94143;

<sup>4</sup> Division of Allergy and Clinical Immunology, Department of Medicine, Henry Ford Health System, Detroit, MI, 48202;

<sup>5</sup> Department of Pathology, University of Michigan, Ann Arbor, MI, 48109;

<sup>6</sup> Division of Pulmonary and Critical Care Medicine, Department of Medicine, University of California, San Francisco, CA, 94143;

<sup>7</sup> Department of Pediatrics, Georgia Regents University, Augusta, GA, 30912

\* These authors contributed equally to this work

† These authors share co-senior authorship for this work

## Supplementary Information

### Supplementary Figures

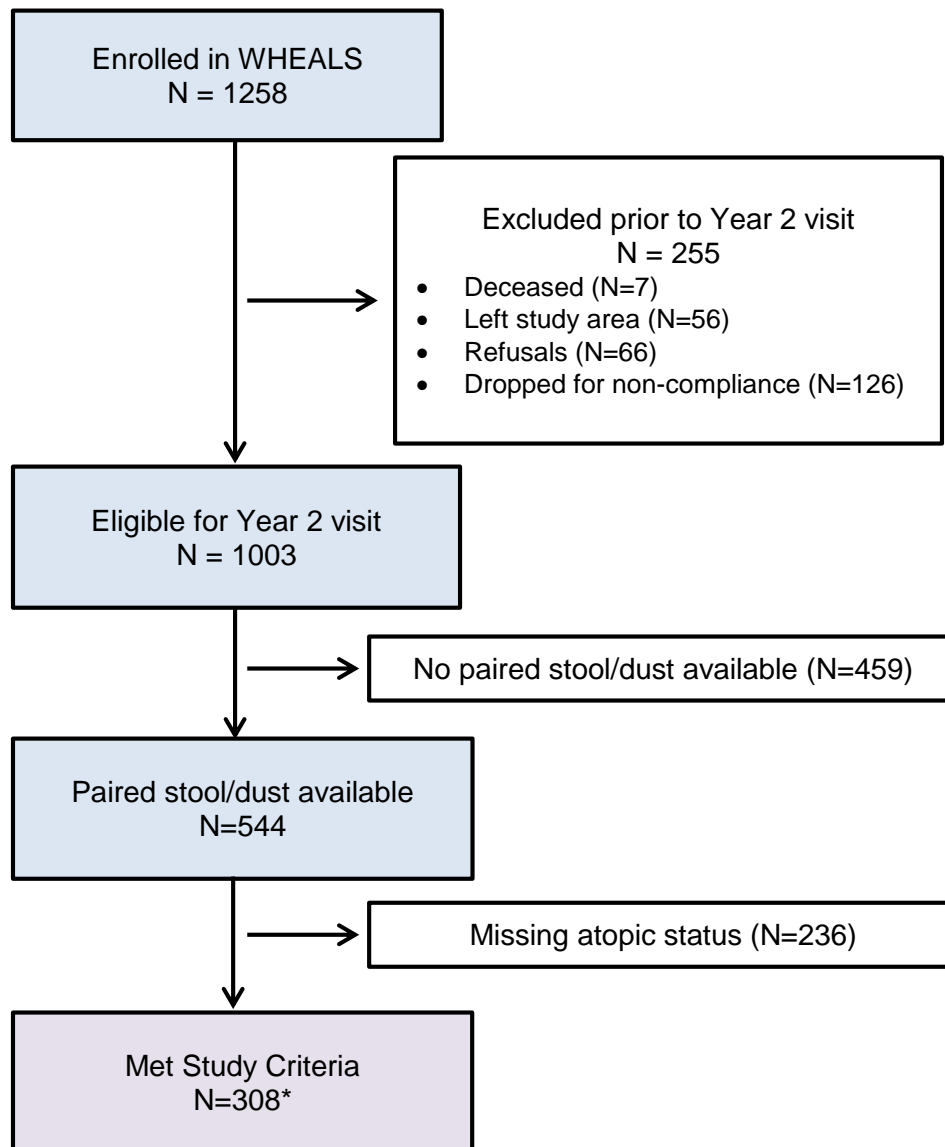

\*N=298 stool samples with sufficient DNA for sequencing

**Supplementary Figure S1: Inclusion/exclusion criteria and number of participants meeting study criteria.** Of the 308 participants that met study criteria and had stool samples that underwent microbial analyses, 298 (n=130 from the 1-month visit and n=168 from the 6-month visit) were successfully sequenced and comprise the (statistical) analytical sample.

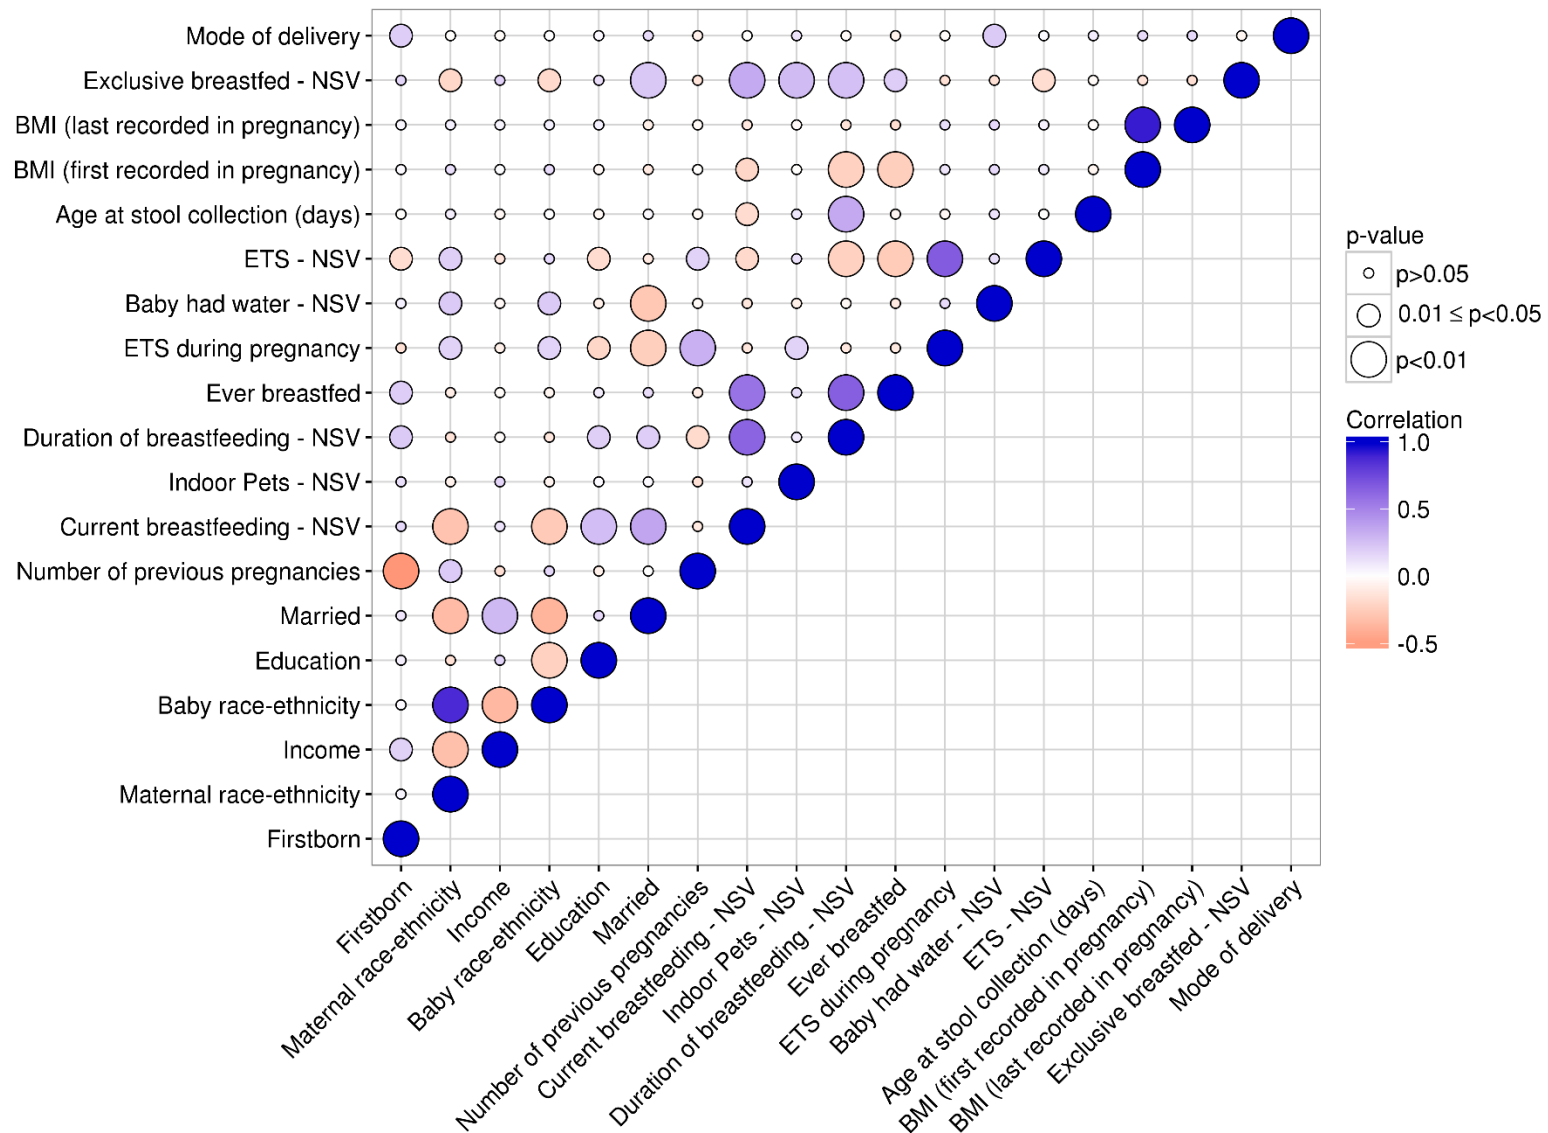

**Supplementary Figure S2: Between-factor correlations among neonates.** The heatmap includes factors associated with compositional differences in the neonatal gut microbiome in either single or multi-factor models. Correlations are Pearson, Point Biserial, or Phi Coefficients, as appropriate. Abbreviations: BMI, body mass index; ETS, environmental tobacco smoke; NSV, neonatal study visit at 1-month of age.

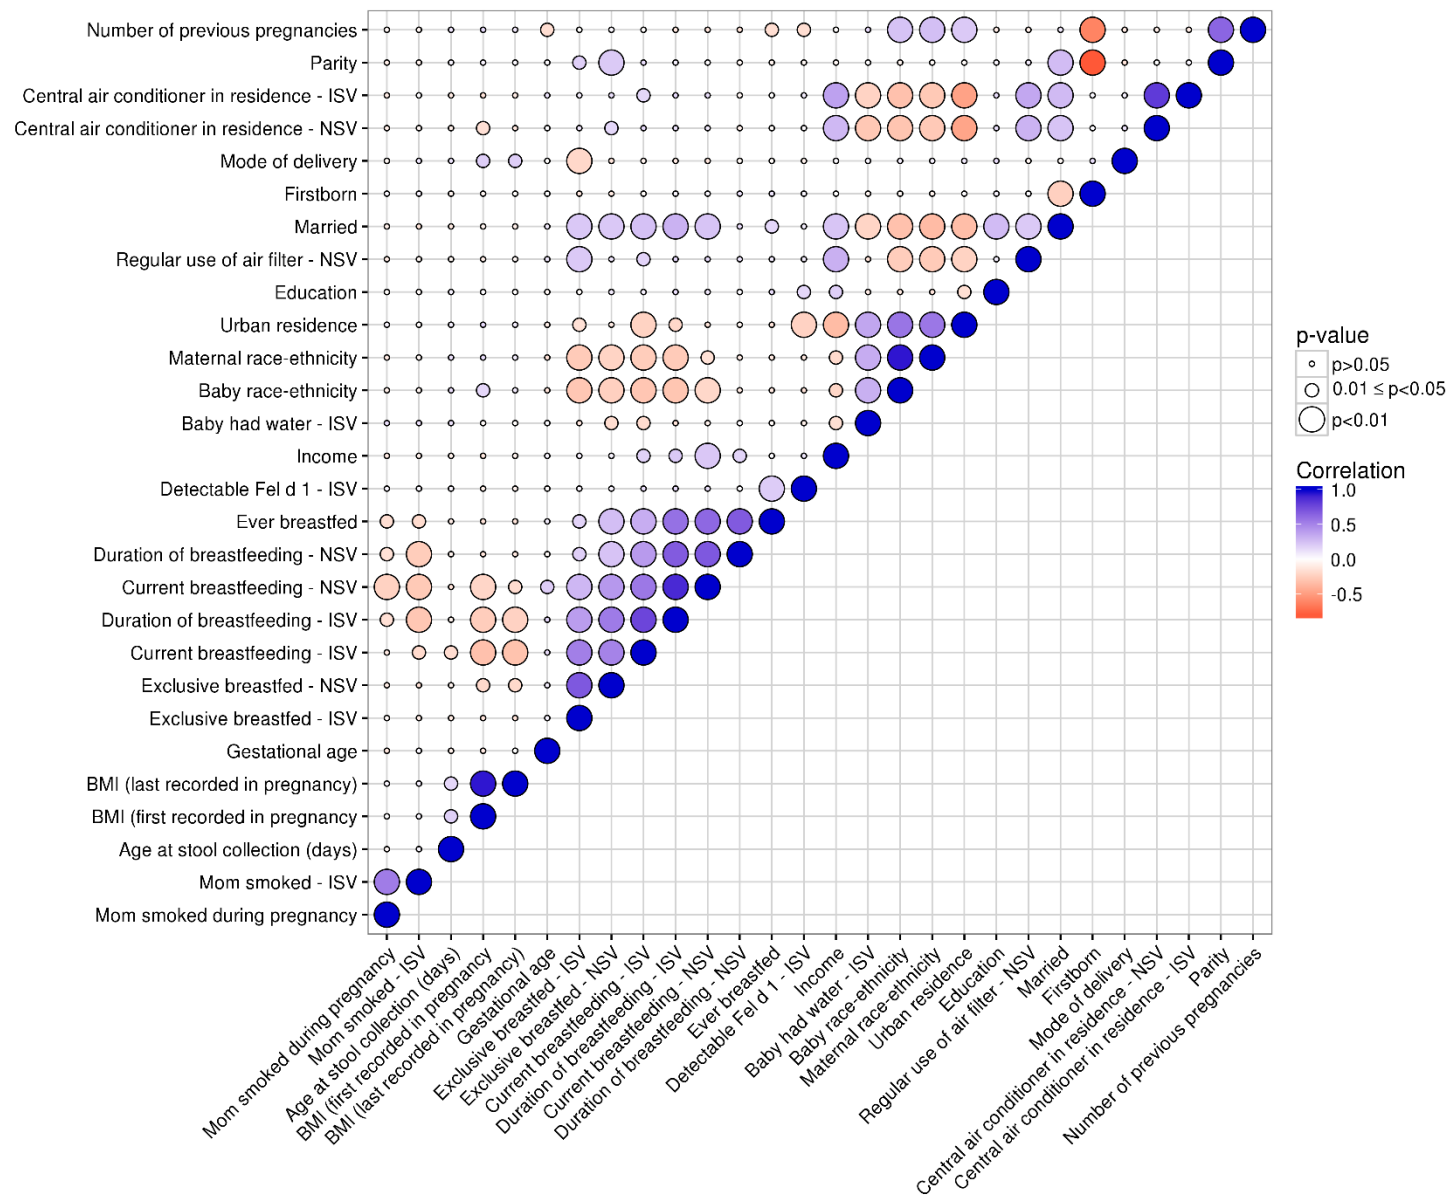

**Supplementary Figure S3: Between-factor correlations among infants.** The heatmap includes factors associated with compositional differences in the infant gut microbiome in either single or multi-factor models. Correlations are Pearson, Point Biserial, or Phi Coefficients, as appropriate. Abbreviations: BMI, body mass index; NSV, neonatal study visit at 1-month of age; ISV, infant study visit at 6-months of age.

## Supplementary Tables

**Supplementary Table S1:** Comparison of characteristics between WHEALS subjects included and excluded from the MAAP study.

|                                                 | MAAP Included           |                         |                           | MAAP Excluded             | WHEALS                     | p-value* | Missing<br>N |
|-------------------------------------------------|-------------------------|-------------------------|---------------------------|---------------------------|----------------------------|----------|--------------|
|                                                 | NSV<br>(N=130)<br>N (%) | ISV<br>(N=168)<br>N (%) | Total<br>(N=308)<br>N (%) | Total<br>(N=950)<br>N (%) | Total<br>(N=1258)<br>N (%) |          |              |
| <b>Demographics</b>                             |                         |                         |                           |                           |                            |          |              |
| <b>Maternal age‡</b>                            | 29.8 (5.2)              | 29.8 (5.3)              | 29.8 (5.2)                | 29.5 (5.3)                | 29.6 (5.2)                 | 0.41     |              |
| <b>Paternal age‡</b>                            | 32.1 (6.9)              | 33.4 (7.1)              | 32.7 (7.0)                | 32.1 (6.7)                | 32.3 (6.8)                 | 0.18     | 92           |
| <b>Maternal race-ethnicity</b>                  |                         |                         |                           |                           |                            | 0.28     |              |
| Caucasian                                       | 31 (23.9%)              | 48 (28.6%)              | 82 (26.6%)                | 208 (21.9%)               | 290 (23.1%)                |          |              |
| African American                                | 82 (63.1%)              | 100 (59.5%)             | 188 (61.0%)               | 590 (62.1%)               | 778 (61.8%)                |          |              |
| Hispanic                                        | 8 (6.1%)                | 6 (3.6%)                | 15 (4.9%)                 | 63 (6.6%)                 | 78 (6.2%)                  |          |              |
| Arab American                                   | 5 (3.8%)                | 9 (5.3%)                | 14 (4.6%)                 | 45 (4.7%)                 | 59 (4.7%)                  |          |              |
| Other                                           | 4 (3.1%)                | 5 (3.0%)                | 9 (2.9%)                  | 44 (4.6%)                 | 53 (4.2%)                  |          |              |
| <b>Married</b>                                  | 75 (57.7%)              | 114 (67.9%)             | 196 (63.6%)               | 577 (60.7%)               | 773 (61.4%)                | 0.36     |              |
| <b>Urban residence</b>                          | 71 (54.6%)              | 83 (49.4%)              | 159 (51.6%)               | 544 (57.3%)               | 703 (55.9%)                | 0.083    |              |
| <b>Household income</b>                         |                         |                         |                           |                           |                            | <0.001   |              |
| <\$40,000                                       | 45 (34.6%)              | 50 (29.8%)              | 99 (32.1%)                | 378 (39.8%)               | 477 (37.9%)                |          |              |
| \$40,000-\$80,000                               | 31 (23.9%)              | 40 (23.8%)              | 73 (23.7%)                | 274 (28.8%)               | 347 (27.6%)                |          |              |
| >\$80,000                                       | 39 (30.0%)              | 54 (32.1%)              | 95 (30.8%)                | 188 (19.8%)               | 283 (22.5%)                |          |              |
| Refused/Did not answer                          | 15 (11.5%)              | 24 (14.3%)              | 41 (13.3%)                | 110 (11.6%)               | 151 (12.0%)                |          |              |
| <b>Maternal education</b>                       |                         |                         |                           |                           |                            | 0.18     |              |
| Less than high school                           | 5 (3.8%)                | 7 (4.2%)                | 13 (4.2%)                 | 61 (6.4%)                 | 74 (5.9%)                  |          |              |
| High school                                     | 23 (17.7%)              | 21 (12.5%)              | 50 (16.2%)                | 178 (18.7%)               | 228 (18.1%)                |          |              |
| More than high school                           | 102 (78.5%)             | 140 (83.3%)             | 245 (79.6%)               | 711 (74.9%)               | 956 (76.0%)                |          |              |
| <b>Pregnancy and Delivery</b>                   |                         |                         |                           |                           |                            |          |              |
| <b>Parity‡</b>                                  | 1.17 (1.24)             | 0.79 (0.89)†            | 0.96 (1.07)               | 1.19 (1.28)               | 1.14 (1.23)                | 0.002    | 2            |
| <b>C-section delivery</b>                       | 41 (31.5%)              | 74 (44.0%)†             | 118 (38.3%)               | 348 (36.9%)               | 466 (37.3%)                | 0.67     | 8            |
| <b>Firstborn</b>                                | 45 (34.6%)              | 76 (45.2%)              | 124 (40.3%)               | 336 (35.4%)               | 460 (36.6%)                | 0.12     | 1            |
| <b>Number of previous pregnancies‡</b>          | 1.94 (1.84)             | 1.62 (1.48)             | 1.78 (1.68)               | 2.07 (1.87)               | 2.00 (1.83)                | 0.011    | 2            |
| <b>Male baby</b>                                | 71 (54.6%)              | 86 (51.2%)              | 164 (53.2%)               | 460 (48.5%)               | 624 (49.6%)                | 0.15     | 1            |
| <b>Maternal antibiotic use during pregnancy</b> | 68 (54.4%)              | 85 (54.1%)              | 158 (54.3%)               | 250 (55.2%)               | 408 (54.8%)                | 0.81     | 514          |
| <b>Maternal antifungal use during pregnancy</b> | 21 (16.8%)              | 36 (22.9%)              | 58 (19.9%)                | 82 (18.1%)                | 140 (18.8%)                | 0.53     | 514          |
| <b>BMI (first recorded during pregnancy)‡</b>   | 30.2 (7.4)              | 30.6 (8.4)              | 30.4 (8.1)                | 30.4 (8.1)                | 30.4 (8.1)                 | 0.95     | 463          |
| <b>BMI (last recorded during pregnancy)‡</b>    | 34.7 (7.4)              | 35.2 (7.9)              | 34.9 (7.7)                | 35.0 (7.8)                | 34.9 (7.7)                 | 0.97     | 463          |
| <b>Birth weight z-score‡</b>                    | -0.05 (0.99)            | -0.11 (1.00)            | -0.09 (1.00)              | -0.13 (0.99)              | -0.12 (0.99)               | 0.61     | 86           |
| <b>Gestational age‡</b>                         | 38.9 (1.5)              | 38.7 (1.8)              | 38.8 (1.7)                | 38.7 (1.8)                | 38.7 (1.8)                 | 0.56     | 26           |

|                                                | MAAP Included           |                         |                           | MAAP Excluded             | WHEALS                     | p-value* | Missing<br>N |
|------------------------------------------------|-------------------------|-------------------------|---------------------------|---------------------------|----------------------------|----------|--------------|
|                                                | NSV<br>(N=130)<br>N (%) | ISV<br>(N=168)<br>N (%) | Total<br>(N=308)<br>N (%) | Total<br>(N=950)<br>N (%) | Total<br>(N=1258)<br>N (%) |          |              |
| <b>Season of birth</b>                         |                         |                         |                           |                           |                            | 0.78     |              |
| Winter                                         | 36 (27.7%)              | 21 (12.5%)†             | 57 (18.5%)                | 200 (21.0%)               | 257 (20.4%)                |          |              |
| Spring                                         | 29 (22.3%)              | 39 (23.2%)              | 74 (24.0%)                | 211 (22.2%)               | 285 (22.7%)                |          |              |
| Summer                                         | 31 (23.8%)              | 52 (31.0%)              | 85 (27.6%)                | 260 (27.4%)               | 345 (27.4%)                |          |              |
| Fall                                           | 34 (26.2%)              | 56 (33.3%)              | 92 (29.9%)                | 279 (29.4%)               | 371 (29.5%)                |          |              |
| <b>Baby race-ethnicity</b>                     |                         |                         |                           |                           |                            | 0.73     |              |
| Caucasian                                      | 25 (19.2%)              | 40 (23.8%)              | 67 (21.8%)                | 200 (21.1%)               | 267 (21.2%)                |          |              |
| African American                               | 83 (63.9%)              | 102 (60.7%)             | 191 (62.0%)               | 595 (62.6%)               | 786 (62.5%)                |          |              |
| Hispanic                                       | 11 (8.5%)               | 9 (5.4%)                | 22 (7.1%)                 | 57 (6.0%)                 | 79 (6.3%)                  |          |              |
| Arab American                                  | 5 (3.8%)                | 12 (7.1%)               | 17 (5.5%)                 | 48 (5.0%)                 | 65 (5.2%)                  |          |              |
| Other                                          | 6 (4.6%)                | 5 (3.0%)                | 11 (3.6%)                 | 50 (5.3%)                 | 61 (4.8%)                  |          |              |
| <b>Feeding practices – NSV</b>                 |                         |                         |                           |                           |                            |          |              |
| <b>Ever breastfed</b>                          | 101 (77.7%)             | 129 (77.7%)             | 230 (78.1%)               | 579 (77.9%)               | 818 (78.0%)                | 0.95     | 209          |
| <b>Exclusively breastfed</b>                   | 16 (12.3%)              | 30 (18.6%)              | 49 (16.3%)                | 88 (12.3%)                | 137 (13.4%)                | 0.086    | 239          |
| <b>Currently breastfed</b>                     | 70 (53.9%)              | 91 (56.5%)              | 169 (56.1%)               | 349 (48.6%)               | 518 (50.8%)                | 0.028    | 239          |
| <b>Duration of breastfeeding (in days)‡</b>    | 24.0 (19.4)             | 22.1 (17.8)             | 23.6 (19.2)               | 24.4 (22.1)               | 24.1 (21.3)                | 0.58     | 241          |
| <b>Baby had water</b>                          | 33 (25.4%)              | 29 (18.0%)              | 65 (21.6%)                | 180 (25.1%)               | 245 (24.1%)                | 0.23     | 240          |
| <b>Baby had antibiotic(s)</b>                  | 3 (2.6%)                | 5 (5.6%)                | 8 (3.8%)                  | 10 (3.9%)                 | 18 (3.8%)                  | 0.96     | 789          |
| <b>Feeding practices – ISV</b>                 |                         |                         |                           |                           |                            |          |              |
| <b>Exclusively breastfed</b>                   | 9 (7.0%)                | 16 (9.5%)               | 26 (8.5%)                 | 36 (4.8%)                 | 62 (5.8%)                  | 0.018    | 195          |
| <b>Currently breastfed</b>                     | 28 (23.5%)              | 46 (27.4%)              | 78 (26.3%)                | 156 (21.6%)               | 234 (23.0%)                | 0.11     | 240          |
| <b>Duration of breastfeeding (in months)‡</b>  | 2.6 (2.6)               | 3.1 (2.9)               | 2.9 (2.8)                 | 2.5 (2.8)                 | 2.6 (2.8)                  | 0.043    | 309          |
| <b>Baby had water</b>                          | 75 (68.8%)              | 115 (68.4%)             | 197 (68.6%)               | 427 (68.0%)               | 624 (68.2%)                | 0.85     | 343          |
| <b>Early solid food (&lt; 4 months of age)</b> | 47 (36.2%)              | 71 (42.3%)              | 122 (39.6%)               | 287 (39.1%)               | 409 (39.2%)                | 0.87     | 215          |
| <b>Environment – during pregnancy</b>          |                         |                         |                           |                           |                            |          |              |
| <b>Indoor pet(s)</b>                           | 49 (37.7%)              | 62 (36.9%)              | 116 (37.7%)               | 322 (33.9%)               | 438 (34.8%)                | 0.23     |              |
| <b>ETS</b>                                     | 33 (25.4%)              | 43 (25.6%)              | 80 (26.0%)                | 267 (28.1%)               | 347 (27.6%)                | 0.47     |              |
| <b>Environment – NSV</b>                       |                         |                         |                           |                           |                            |          |              |
| <b>Indoor pet(s)</b>                           | 44 (33.9%)              | 50 (31.1%)              | 99 (32.9%)                | 222 (30.9%)               | 321 (31.5%)                | 0.54     | 239          |
| <b>ETS</b>                                     | 24 (18.5%)              | 26 (16.2%)              | 54 (17.9%)                | 145 (20.2%)               | 199 (19.5%)                | 0.41     | 238          |
| <b>Mom smoked</b>                              | 14 (10.8%)              | 12 (7.5%)               | 27 (9.0%)                 | 79 (11.0%)                | 106 (40.4%)                | 0.33     | 239          |
| <b>Endotoxin - Mother's mattress§</b>          | 3.2 (1.3-6.7)           | 3.5 (1.3-8.1)           | 3.2 (1.3–7.2)             | 3.8 (1.5–8.9)             | 3.5 (1.5–8.5)              | 0.17     | 307          |
| <b>Endotoxin - Mother's bedroom floor§</b>     | 14.9 (4.7-39.4)         | 13.7 (4.7-29.3)         | 14.2 (4.7–35.5)           | 14.6 (5.1–34.0)           | 14.4 (5.0–34.3)            | 0.62     | 316          |
| <b>Endotoxin - Baby's mattress§</b>            | 2.8 (1.2-6.1)           | 2.4 (0.9-5.5)           | 2.7 (1.1–5.5)             | 2.6 (1.0–6.0)             | 2.6 (1.0–5.8)              | 0.83     | 276          |
| <b>Endotoxin - Baby's bedroom floor§</b>       | 12.7 (4.1-38.4)         | 14.2 (4.9-32.4)         | 13.9 (4.4–35.9)           | 13.5 (4.9–33.0)           | 13.7 (4.8–33.6)            | 0.77     | 291          |
| <b>Endotoxin - living room floor§</b>          | 20.6 (9.4-49.9)         | 22.0 (6.5-43.4)         | 20.7 (7.9–45.2)           | 21.0 (8.8–46.2)           | 20.9 (8.6–46.0)            | 0.99     | 295          |

|                                             | MAAP Included           |                         |                           | MAAP Excluded             | WHEALS                     | p-value* | Missing<br>N |
|---------------------------------------------|-------------------------|-------------------------|---------------------------|---------------------------|----------------------------|----------|--------------|
|                                             | NSV<br>(N=130)<br>N (%) | ISV<br>(N=168)<br>N (%) | Total<br>(N=308)<br>N (%) | Total<br>(N=950)<br>N (%) | Total<br>(N=1258)<br>N (%) |          |              |
| <b>Detectable Can f 1</b>                   | 79 (62.7%)              | 94 (60.3%)              | 180 (61.6%)               | 415 (59.0%)               | 595 (59.8%)                | 0.44     | 263          |
| <b>Detectable Fel d 1</b>                   | 83 (65.4%)              | 117 (76.0%)             | 209 (71.8%)               | 559 (79.5%)               | 768 (77.3%)                | 0.008    | 264          |
| <b>Detectable Der f 1</b>                   | 40 (31.5%)              | 58 (37.4%)              | 101 (34.6%)               | 271 (38.7%)               | 372 (37.5%)                | 0.23     | 265          |
| <b>Regular attendance at daycare</b>        | 1 (0.8%)                | 4 (2.5%)                | 5 (1.7%)                  | 39 (5.4%)                 | 44 (4.3%)                  | 0.007    | 238          |
| <b>Central air conditioner in residence</b> | 75 (57.7%)              | 97 (60.2%)              | 176 (58.5%)               | 401 (56.0%)               | 577 (56.7%)                | 0.47     | 241          |
| <b>Clothes dryer in residence</b>           | 114 (87.7%)             | 140 (87.0%)             | 264 (87.7%)               | 615 (85.8%)               | 879 (86.4%)                | 0.41     | 240          |
| <b>Use gas cooking stove</b>                | 86 (66.2%)              | 110 (68.3%)             | 202 (67.1%)               | 469 (65.4%)               | 671 (65.9%)                | 0.60     | 240          |
| <b>Regular use of air filter</b>            | 63 (49.2%)              | 77 (49.4%)              | 144 (49.0%)               | 306 (45.4%)               | 450 (46.5%)                | 0.30     | 290          |
| <b>Residence built before 1950</b>          | 20 (15.9%)              | 23 (14.8%)              | 45 (15.5%)                | 107 (15.7%)               | 152 (15.6%)                | 0.95     | 285          |
| <b>Environment – ISV</b>                    |                         |                         |                           |                           |                            |          |              |
| <b>Indoor pet(s)</b>                        | 33 (30.3%)              | 47 (28.1%)              | 85 (29.7%)                | 188 (30.0%)               | 273 (29.9%)                | 0.92     | 346          |
| <b>ETS</b>                                  | 21 (19.3%)              | 29 (17.3%)              | 55 (19.2%)                | 129 (20.5%)               | 184 (20.1%)                | 0.64     | 342          |
| <b>Mom smoked</b>                           | 12 (11.0%)              | 15 (8.9%)               | 29 (10.1%)                | 74 (11.8%)                | 103 (11.3%)                | 0.46     | 343          |
| <b>Endotoxin - Mother's mattress§</b>       | 2.6 (1.0-6.8)           | 3.5 (1.2-7.6)           | 3.2 (1.2–7.3)             | 3.4 (1.3–8.0)             | 3.5 (1.3–7.8)              | 0.32     | 442          |
| <b>Endotoxin - Mother's bedroom floor§</b>  | 11.4 (4.9-25.2)         | 14.5 (6.0-29.3)         | 13.3 (5.5–28.5)           | 13.0 (4.8–32.9)           | 13.1 (5.0–30.6)            | 0.99     | 451          |
| <b>Endotoxin - Baby's mattress§</b>         | 3.2 (1.4-7.8)           | 3.6 (1.1-8.3)           | 3.4 (1.2–8.1)             | 3.5 (1.3–9.0)             | 3.35 (1.3–8.7)             | 0.56     | 387          |
| <b>Endotoxin - Baby's bedroom floor§</b>    | 10.8 (4.0-27.9)         | 13.6 (5.1-38.7)         | 12.5 (4.3–31.5)           | 13.0 (4.5–33.4)           | 12.9 (4.5–32.9)            | 0.86     | 405          |
| <b>Endotoxin - living room floor§</b>       | 20.7 (8.0-42.4)         | 22.2 (8.9-49.3)         | 22.0 (8.5–46.0)           | 19.0 (7.6–41.5)           | 19.5 (7.8–42.4)            | 0.19     | 400          |
| <b>Detectable Can f 1</b>                   | 59 (54.6%)              | 102 (61.4%)             | 169 (59.5%)               | 342 (57.2%)               | 511 (57.9%)                | 0.52     | 376          |
| <b>Detectable Fel d 1</b>                   | 76 (70.4%)              | 127 (76.0%)             | 211 (74.0%)               | 460 (76.9%)               | 671 (76.0%)                | 0.35     | 375          |
| <b>Detectable Der f 1</b>                   | 31 (28.7%)              | 77 (46.1%)†             | 112 (39.3%)               | 242 (40.0%)               | 354 (39.8%)                | 0.84     | 368          |
| <b>Regular attendance at daycare</b>        | 42 (38.5%)              | 71 (42.3%)              | 116 (40.4%)               | 180 (28.6%)               | 296 (32.3%)                | <.001    | 342          |
| <b>Central air conditioner in residence</b> | 71 (65.1%)              | 99 (58.9%)              | 174 (60.6%)               | 347 (55.5%)               | 521 (57.1%)                | 0.15     | 346          |
| <b>Clothes dryer in residence</b>           | 95 (87.2%)              | 144 (86.2%)             | 248 (86.7%)               | 539 (85.8%)               | 787 (86.1%)                | 0.72     | 344          |
| <b>Use gas cooking stove</b>                | 75 (68.8%)              | 119 (70.8%)             | 201 (70.0%)               | 423 (67.4%)               | 624 (68.2%)                | 0.42     | 343          |
| <b>Regular use of air filter</b>            | 54 (50.9%)              | 79 (49.1%)              | 137 (49.6%)               | 289 (48.3%)               | 426 (48.7%)                | 0.72     | 384          |
| <b>Residence built before 1950</b>          | 22 (20.6%)              | 17 (10.7%)†             | 41 (14.9%)                | 89 (14.9%)                | 130 (14.9%)                | 0.98     | 386          |

Abbreviations: BMI, body mass index; ETS, environmental tobacco smoke; MAAP, the Microbes, Allergy, Asthma, and Pets study; WHEALS, the Wayne County Health Environment Asthma and Allergy Longitudinal Study; NSV, neonatal study visit at 1-month of age; ISV, infant study visit at 6-months of age.

\*compares included (n=308) vs excluded (n=950)

† p<0.05 for comparison of NSV to ISV samples

‡ mean (standard deviation)

§ median (interquartile range)

**Supplementary Table S2:** Description of early life variables used in analyses.

| Variable                       | Measurement Time(s) | Source of Measurement | Additional Details                                                                                                                                               | Rate of Missingness |
|--------------------------------|---------------------|-----------------------|------------------------------------------------------------------------------------------------------------------------------------------------------------------|---------------------|
| <i>Demographics</i>            |                     |                       |                                                                                                                                                                  |                     |
| <b>Maternal race-ethnicity</b> | PD/D                | Questionnaire         | Mother asked what she considers herself to be: African American (non-hispanic, non-arabic), White (non-hispanic, non-arabic), Hispanic, Arabic, other/mixed race | 0%                  |
| <b>Marital status</b>          | PD/D                | Questionnaire         | Current marital status categorized as: Married/living as married; Separated/divorced; Widowed; Never married                                                     | 0%                  |
| <b>Urban residence</b>         | PD/D                | Questionnaire         | Using self-reported home address, urban was defined as within the confines of the city of Detroit, all else was defined suburban                                 | 0%                  |
| <b>Household income</b>        | PD/D                | Questionnaire         | Classified in ranges: <\$20K; \$20K-<\$40K; \$40K-<\$80K; \$80K-<\$100K; \$100K or more                                                                          | 13%                 |
| <b>Maternal education</b>      | PD/D                | Questionnaire         | Highest level of education categorized as: < high school; High school diploma or equivalent; some college; Bachelor's degree; Master's degree or more            | 0%                  |
| <b>Maternal age</b>            | PD/D                | Questionnaire         | Calculated from birth date as of PD interview date                                                                                                               | 0%                  |
| <b>Paternal age</b>            | PD/D                | Questionnaire         | Calculated from birth date as of PD interview date                                                                                                               | 9%                  |



| Variable                                        | Measurement Time(s) | Source of Measurement | Additional Details                                                                                                                                                  | Rate of Missingness |
|-------------------------------------------------|---------------------|-----------------------|---------------------------------------------------------------------------------------------------------------------------------------------------------------------|---------------------|
| <b><i>Pregnancy and Delivery</i></b>            |                     |                       |                                                                                                                                                                     |                     |
| <b>Mode of delivery (C-section vs. vaginal)</b> | PD/D                | Chart Abstraction     |                                                                                                                                                                     | 0%                  |
| <b>Mode of delivery (type)</b>                  | PD/D                | Chart Abstraction     | Specific mode of delivery type: planned C-section, unplanned C-section, vaginal delivery                                                                            | 0%                  |
| <b>Firstborn</b>                                | PD/D                | Questionnaire         | Asked about all previous pregnancies and outcomes                                                                                                                   | 0%                  |
| <b>Parity</b>                                   | PD/D                | Questionnaire         | Asked about all previous pregnancies and outcomes                                                                                                                   | 0%                  |
| <b>Number of previous pregnancies</b>           | PD/D                | Questionnaire         | Asked about all previous pregnancies and outcomes                                                                                                                   | 0%                  |
| <b>Baby gender</b>                              | PD/D                | Questionnaire         | Female; Male                                                                                                                                                        | 0%                  |
| <b>Maternal antibiotic use during pregnancy</b> | PD/D                | Chart Abstraction     | Mom had at least one antibiotic prescription during pregnancy                                                                                                       | 5%                  |
| <b>Maternal antifungal use during pregnancy</b> | PD/D                | Chart Abstraction     | Mom had at least one antifungal prescription during pregnancy                                                                                                       | 5%                  |
| <b>BMI (first recorded in pregnancy)</b>        | PD/D                | Chart Abstraction     | Calculated as kg/m <sup>2</sup>                                                                                                                                     | 5%                  |
| <b>BMI (last recorded in pregnancy)</b>         | PD/D                | Chart Abstraction     | Calculated as kg/m <sup>2</sup>                                                                                                                                     | 5%                  |
| <b>Birth weight z-score</b>                     | PD/D                | Chart Abstraction     | Gender- and gestational-age adjusted, calculated using the US population as a reference                                                                             | 5%                  |
| <b>Gestational age</b>                          | PD/D                | Chart Abstraction     |                                                                                                                                                                     | 1%                  |
| <b>Season of birth</b>                          | PD/D                | Questionnaire         | Calculated from birth date                                                                                                                                          | 0%                  |
| <b>Baby race-ethnicity</b>                      | 24 Month            | Questionnaire         | Mother asked what she considers her child to be: African American (non-hispanic, non-arabic), White (non-hispanic, non-arabic), Hispanic, Arabic, other/mixed race. | 0%                  |

### ***Feeding Practices***

| Variable                                      | Measurement Time(s) | Source of Measurement | Additional Details                                                                                     | Rate of Missingness                 |
|-----------------------------------------------|---------------------|-----------------------|--------------------------------------------------------------------------------------------------------|-------------------------------------|
| <b>Ever breastfed</b>                         | NSV                 | Questionnaire         | Mother asked if she breastfed her baby at any time (even one attempt was considered as ever breastfed) | 1%                                  |
| <b>Exclusive breastfed</b>                    | NSV, ISV            | Questionnaire         | Currently breastfeeding baby + report of never giving baby any formula                                 | 0% (NSV);<br>0% (ISV)               |
| <b>Current breastfeeding</b>                  | NSV, ISV            | Questionnaire         | Mother asked if she was breastfeeding her baby at the time of the interview                            | 0% (NSV);<br>0% (ISV)               |
| <b>Duration of breastfeeding</b>              | NSV, ISV            | Questionnaire         | Mother asked when breastfeeding was discontinued                                                       | 0% (NSV);<br>7% (ISV)               |
| <b>Baby had water</b>                         | NSV, ISV            | Questionnaire         | Baby drinks water, excluding rinsing baby's mouth and mixing with formula                              | 0% (NSV);<br>0% (ISV)               |
| <b>Baby had antibiotic(s)</b>                 | NSV, ISV            | Chart Abstraction     | Any non-topical antibiotics prescribed, before the respective stool sample was collected               | 12% (NSV);<br>22% (ISV)             |
| <b>Early solid food (&lt;4 months of age)</b> | ISV                 | Questionnaire         | Any cereal, solid food, or cow's milk (not processed in a formula) introduced before 4 months of age   | 0%                                  |
| <b><i>Environment</i></b>                     |                     |                       |                                                                                                        |                                     |
| <b>Indoor pet(s)</b>                          | PD/D, NSV, ISV      | Questionnaire         | Any dog(s) or cat(s) in household that spent at least one hour inside the home every day               | 0% (PD/D);<br>0% (NSV);<br>1% (ISV) |
| <b>ETS</b>                                    | PD/D, NSV, ISV      | Questionnaire         | Any person living in the home who smoked at least 1 cigarette/cigar/pipe per day                       | 0% (PD/D);<br>0% (NSV);<br>0% (ISV) |
| <b>Mom smoked</b>                             | PD/D, NSV, ISV      | Questionnaire         | Mom smoked at least 1 cigarette/cigar/pipe per day                                                     | 0% (PD/D);<br>0% (NSV);<br>0% (ISV) |
| <b>Endotoxin - Mother's mattress</b>          | NSV, ISV            | Home Visit            | Measured from collected house dust samples*                                                            | 5% (NSV);<br>5% (ISV)               |

| Variable                                    | Measurement Time(s) | Source of Measurement | Additional Details                                                                                  | Rate of Missingness   |
|---------------------------------------------|---------------------|-----------------------|-----------------------------------------------------------------------------------------------------|-----------------------|
| <b>Endotoxin - Mother's bedroom floor</b>   | NSV, ISV            | Home Visit            | Measured from collected house dust samples*                                                         | 4% (NSV);<br>6% (ISV) |
| <b>Endotoxin - Baby's mattress</b>          | NSV, ISV            | Home Visit            | Measured from collected house dust samples*                                                         | 2% (NSV);<br>2% (ISV) |
| <b>Endotoxin - Baby's bedroom floor</b>     | NSV, ISV            | Home Visit            | Measured from collected house dust samples*                                                         | 3% (NSV);<br>4% (ISV) |
| <b>Endotoxin - living room floor</b>        | NSV, ISV            | Home Visit            | Measured from collected house dust samples*                                                         | 3% (NSV);<br>4% (ISV) |
| <b>Detectable Can f 1</b>                   | NSV, ISV            | Home Visit            | Measured from collected house dust samples, only from child's bedroom floor*                        | 3% (NSV);<br>1% (ISV) |
| <b>Detectable Fel d 1</b>                   | NSV, ISV            | Home Visit            | Measured from collected house dust samples, only from child's bedroom floor*                        | 2% (NSV);<br>1% (ISV) |
| <b>Detectable Der f 1</b>                   | NSV, ISV            | Home Visit            | Measured from collected house dust samples, only from child's bedroom floor*                        | 2% (NSV);<br>1% (ISV) |
| <b>Regular attendance at daycare</b>        | NSV, ISV            | Questionnaire         | Mom reports if child spends at least 3 days per week or at least 10 days per month in daycare       | 0% (NSV);<br>0% (ISV) |
| <b>Central air conditioner in residence</b> | NSV, ISV            | Questionnaire         | Maternal report of central air conditioning in home                                                 | 0% (NSV);<br>0% (ISV) |
| <b>Clothes dryer in residence</b>           | NSV, ISV            | Questionnaire         | Maternal report of clothes' dryer in home                                                           | 0% (NSV);<br>1% (ISV) |
| <b>Use gas cooking stove</b>                | NSV, ISV            | Questionnaire         | Maternal report of use of gas cooking store, range or oven                                          | 0% (NSV);<br>0% (ISV) |
| <b>Regular use of air filter</b>            | NSV, ISV            | Questionnaire         | Regular use defined as at least once a month                                                        | 2% (NSV);<br>4% (ISV) |
| <b>Year residence built</b>                 | NSV, ISV            | Questionnaire         | Maternal report categorized as:<br>1990-Present; 1980-1989;<br>1970-1979; 1950-1969;<br>Before 1950 | 0% (NSV);<br>3% (ISV) |

### *Specimen Characteristics*

| <b>Variable</b>                       | <b>Measurement Time(s)</b> | <b>Source of Measurement</b> | <b>Additional Details</b>                                                 | <b>Rate of Missingness</b> |
|---------------------------------------|----------------------------|------------------------------|---------------------------------------------------------------------------|----------------------------|
| <b>Age at stool collection (days)</b> | NSV, ISV                   | Home Visit                   | Calculated by subtracting baby's date of birth from stool collection date | 0% (NSV);<br>0% (ISV)      |
| <b>Season stool collected</b>         | NSV, ISV                   | Home Visit                   | Calculated from stool collection date                                     | 0% (NSV);<br>0% (ISV)      |

Abbreviations: BMI, body mass index; ETS, environmental tobacco smoke; PD/D, pre-delivery/delivery; NSV, neonatal study visit at 1-month of age; ISV, infant study visit at 6-months of age.

\*See methods for additional details

**Supplementary Table S3:** Single factor PERMANOVA gut microbiome compositional analyses using both unweighted and weighted UniFrac distances metrics.

| Factor                                   | Neonates           |                  | Infants            |                  |
|------------------------------------------|--------------------|------------------|--------------------|------------------|
|                                          | Unweighted UniFrac | Weighted UniFrac | Unweighted UniFrac | Weighted UniFrac |
| P (% variation explained)                |                    |                  |                    |                  |
| <b>Demographics</b>                      |                    |                  |                    |                  |
| Maternal race-ethnicity                  | 0.002 (3.8%)*      | 0.478 (3%)       | <0.001 (3.3%)      | 0.028 (3.9%)     |
| Marital status                           | 0.001 (2.2%)       | 0.247 (1.9%)     | 0.001 (2.3%)       | 0.443 (1.8%)     |
| Urban residence                          | 0.147 (0.9%)       | 0.221 (1%)       | 0.008 (0.8%)       | 0.18 (0.9%)      |
| Household income                         | 0.008 (4.1%)       | 0.077 (5.2%)     | 0.001 (3.5%)       | 0.020 (4.8%)     |
| Maternal education                       | 0.044 (2.6%)       | 0.385 (2.4%)     | <0.001 (2.8%)      | 0.072 (2.7%)     |
| Maternal age                             | 0.15 (0.9%)        | 0.36 (0.8%)      | 0.492 (0.6%)       | 0.395 (0.6%)     |
| Paternal age                             | 0.22 (0.9%)        | 0.208 (1.2%)     | 0.749 (0.6%)       | 0.497 (0.6%)     |
| <b>Pregnancy and Delivery</b>            |                    |                  |                    |                  |
| Mode of delivery (c-section vs. vaginal) | <0.001 (1.9%)      | 0.002 (3.4%)     | 0.001 (1%)         | 0.11 (1%)        |
| Mode of delivery (type)†                 | <0.001 (2.7%)      | 0.013 (3.6%)     | 0.001 (1.7%)       | 0.018 (2.5%)     |
| Vaginal vs. planned c-section            | <0.001 (1.8%)      | 0.017 (2.7%)     | 0.072 (1.0%)       | 0.31 (0.9%)      |
| Vaginal vs. unplanned c-section          | 0.001 (1.6%)       | 0.031 (2.2%)     | 0.001 (1.3%)       | 0.019 (2.0%)     |
| Planned vs. unplanned c-section          | 0.48 (2.5%)        | 0.96 (0.7%)      | 0.15 (1.5%)        | 0.022 (3.5%)     |
| Firstborn                                | 0.002 (1.2%)       | 0.039 (1.8%)     | 0.015 (0.8%)       | 0.147 (0.9%)     |
| Parity                                   | 0.074 (0.9%)       | 0.199 (1.1%)     | 0.019 (0.8%)       | 0.24 (0.8%)      |
| Number of previous pregnancies           | 0.004 (1.1%)       | 0.135 (1.3%)     | 0.022 (0.8%)       | 0.251 (0.7%)     |
| Baby gender                              | 0.298 (0.8%)       | 0.696 (0.5%)     | 0.219 (0.6%)       | 0.823 (0.3%)     |
| Maternal antibiotic use during pregnancy | 0.146 (0.9%)       | 0.26 (1%)        | 0.519 (0.6%)       | 0.208 (0.9%)     |
| Maternal antifungal use during pregnancy | 0.658 (0.8%)       | 0.757 (0.4%)     | 0.066 (0.8%)       | 0.686 (0.4%)     |
| BMI (first recorded in pregnancy)        | 0.004 (1.2%)       | 0.602 (0.6%)     | 0.001 (1.1%)       | 0.192 (0.9%)     |
| BMI (last recorded in pregnancy)         | 0.026 (1%)         | 0.505 (0.7%)     | 0.001 (1.1%)       | 0.246 (0.8%)     |
| Birth weight z-score                     | 0.951 (0.7%)       | 0.317 (0.9%)     | 0.495 (0.6%)       | 0.739 (0.4%)     |
| Gestational age                          | 0.523 (0.8%)       | 0.495 (0.7%)     | 0.383 (0.6%)       | 0.011 (1.9%)     |
| Season of birth                          | 0.409 (2.3%)       | 0.087 (3.5%)     | 0.78 (1.7%)        | 0.079 (2.7%)     |
| Baby race-ethnicity                      | 0.006 (3.7%)       | 0.902 (2%)       | <0.001 (3.3%)      | 0.04 (3.8%)      |
| Mom smoked during pregnancy              | 0.396 (0.8%)       | 0.905 (0.3%)     | 0.185 (0.7%)       | 0.047 (1.3%)     |
| <b>Feeding Practices – NSV</b>           |                    |                  |                    |                  |
| Ever breastfed                           | <0.001 (1.4%)      | 0.284 (0.9%)     | 0.008 (0.9%)       | 0.191 (0.8%)     |
| Exclusive breastfed                      | <0.001 (1.4%)      | 0.049 (1.7%)     | <0.001 (1.7%)      | <0.001 (5.1%)    |
| Current breastfeeding                    | <0.001 (2.1%)      | 0.224 (1%)       | <0.001 (1.3%)      | 0.004 (2.2%)     |
| Duration of breastfeeding                | 0.009 (1.1%)       | 0.613 (0.6%)     | 0.017 (0.9%)       | 0.212 (0.9%)     |
| Baby had water                           | 0.004 (1.2%)       | 0.206 (1.1%)     | 0.185 (0.7%)       | 0.657 (0.4%)     |

| Factor                 | Neonates           |                  | Infants            |                  |
|------------------------|--------------------|------------------|--------------------|------------------|
|                        | Unweighted UniFrac | Weighted UniFrac | Unweighted UniFrac | Weighted UniFrac |
| Baby had antibiotic(s) | 0.134 (1%)         | 0.623 (0.6%)     | 0.292 (1.2%)       | 0.375 (1.2%)     |

#### Feeding Practices – ISV

|                                     | P (% variation explained) |   |               |               |
|-------------------------------------|---------------------------|---|---------------|---------------|
| Exclusive breastfed                 | —‡                        | — | <0.001 (2%)   | <0.001 (7.1%) |
| Current breastfeeding               | —                         | — | <0.001 (2.6%) | <0.001 (9.2%) |
| Duration of breastfeeding           | —                         | — | <0.001 (1.8%) | <0.001 (3.8%) |
| Baby had water                      | —                         | — | 0.035 (0.8%)  | 0.311 (0.7%)  |
| Baby had antibiotic(s)              | —                         | — | 0.395 (0.8%)  | 0.743 (0.5%)  |
| Early solid food (<4 months of age) | —                         | — | 0.733 (0.6%)  | 0.148 (0.9%)  |

#### Environment – during pregnancy

|                                |              |              |              |              |
|--------------------------------|--------------|--------------|--------------|--------------|
| Indoor pet(s) during pregnancy | 0.065 (2.6%) | 0.312 (2.6%) | 0.132 (1.9%) | 0.17 (2.3%)  |
| ETS during pregnancy           | 0.021 (1%)   | 0.314 (0.9%) | 0.223 (0.6%) | 0.169 (0.9%) |

#### Environment – NSV

|                                      |              |              |              |              |
|--------------------------------------|--------------|--------------|--------------|--------------|
| Indoor pet(s)                        | 0.086 (2.6%) | 0.391 (2.4%) | 0.063 (2.1%) | 0.111 (2.6%) |
| ETS                                  | 0.007 (1.1%) | 0.328 (0.9%) | 0.388 (0.6%) | 0.274 (0.8%) |
| Mom smoked                           | 0.321 (0.8%) | 0.475 (0.7%) | 0.147 (0.7%) | 0.171 (0.9%) |
| Endotoxin - Mother's mattress        | 0.156 (0.9%) | 0.081 (1.6%) | 0.262 (0.7%) | 0.729 (0.4%) |
| Endotoxin - Mother's bedroom floor   | 0.646 (0.8%) | 0.944 (0.2%) | 0.242 (0.7%) | 0.634 (0.5%) |
| Endotoxin - Baby's mattress          | 0.315 (0.8%) | 0.108 (1.4%) | 0.894 (0.6%) | 0.996 (0.1%) |
| Endotoxin - Baby's bedroom floor     | 0.25 (0.9%)  | 0.926 (0.3%) | 0.242 (0.7%) | 0.326 (0.7%) |
| Endotoxin - living room floor        | 0.133 (0.9%) | 0.094 (1.4%) | 0.282 (0.7%) | 0.357 (0.7%) |
| Detectable Can f 1                   | 0.175 (0.9%) | 0.28 (1%)    | 0.313 (0.7%) | 0.265 (0.8%) |
| Detectable Fel d 1                   | 0.154 (0.9%) | 0.813 (0.4%) | 0.088 (0.8%) | 0.479 (0.6%) |
| Detectable Der f 1                   | 0.386 (0.8%) | 0.711 (0.5%) | 0.815 (0.6%) | 0.823 (0.3%) |
| Regular attendance at daycare        | 0.856 (0.7%) | 0.932 (0.3%) | 0.324 (0.6%) | 0.858 (0.3%) |
| Central air conditioner in residence | 0.185 (0.8%) | 0.369 (0.8%) | 0.017 (0.8%) | 0.145 (1%)   |
| Clothes dryer in residence           | 0.141 (0.9%) | 0.791 (0.4%) | 0.539 (0.6%) | 0.701 (0.4%) |
| Use gas cooking stove                | 0.279 (0.8%) | 0.18 (1.1%)  | 0.641 (0.6%) | 0.63 (0.4%)  |
| Regular use of air filter            | 0.057 (1%)   | 0.136 (1.3%) | 0.001 (1.1%) | 0.019 (1.7%) |
| Year residence built                 | 0.345 (1.6%) | 0.461 (1.5%) | 0.953 (1.1%) | 0.911 (0.7%) |

#### Environment – ISV

|                               |   |   |              |              |
|-------------------------------|---|---|--------------|--------------|
| Indoor pet(s)                 | — | — | 0.339 (0.6%) | 0.299 (0.7%) |
| ETS                           | — | — | 0.167 (0.7%) | 0.115 (1%)   |
| Endotoxin - Mother's mattress | — | — | 0.54 (0.6%)  | 0.737 (0.4%) |

| Factor                               | Neonates                         |                  | Infants            |                  |
|--------------------------------------|----------------------------------|------------------|--------------------|------------------|
|                                      | Unweighted UniFrac               | Weighted UniFrac | Unweighted UniFrac | Weighted UniFrac |
|                                      | <b>P (% variation explained)</b> |                  |                    |                  |
| Endotoxin - Mother's bedroom floor   | —                                | —                | 0.368 (0.7%)       | 0.435 (0.6%)     |
| Endotoxin - Baby's mattress          | —                                | —                | 0.923 (0.5%)       | 0.95 (0.2%)      |
| Endotoxin - Baby's bedroom floor     | —                                | —                | 0.791 (0.6%)       | 0.714 (0.4%)     |
| Endotoxin - living room floor        | —                                | —                | 0.83 (0.6%)        | 0.879 (0.3%)     |
| Mom smoked                           | —                                | —                | 0.122 (0.7%)       | 0.379 (0.6%)     |
| Detectable Can f 1                   | —                                | —                | 0.274 (0.6%)       | 0.228 (0.8%)     |
| Detectable Fel d 1                   | —                                | —                | 0.33 (0.6%)        | 0.031 (1.4%)     |
| Detectable Der f 1                   | —                                | —                | 0.525 (0.6%)       | 0.212 (0.8%)     |
| Regular attendance at daycare        | —                                | —                | 0.08 (0.7%)        | 0.167 (0.9%)     |
| Central air conditioner in residence | —                                | —                | 0.002 (0.9%)       | 0.019 (1.6%)     |
| Clothes dryer in residence           | —                                | —                | 0.355 (0.6%)       | 0.218 (0.8%)     |
| Use gas cooking stove                | —                                | —                | 0.396 (0.6%)       | 0.676 (0.4%)     |
| Regular use of air filter            | —                                | —                | 0.058 (0.8%)       | 0.336 (0.7%)     |
| Year residence built                 | —                                | —                | 0.996 (1.1%)       | 0.993 (0.4%)     |

#### Specimen Characteristics

|                                |               |              |               |              |
|--------------------------------|---------------|--------------|---------------|--------------|
| Age at stool collection (days) | <0.001 (1.5%) | 0.097 (1.4%) | <0.001 (1.1%) | 0.022 (1.5%) |
| Season stool collected         | 0.195 (2.5%)  | 0.182 (3%)   | 0.492 (1.8%)  | 0.368 (1.9%) |

Abbreviations: BMI, body mass index; ETS, environmental tobacco smoke; NSV, neonatal study visit at 1-month of age; ISV, infant study visit at 6-months of age.

\*factor/metric combinations with PERMANOVA p-value < 0.05 are shaded.

† planned C-section, unplanned C-section, vaginal delivery

‡ indicates that the analysis was not conducted among the neonates because the measurement corresponded to the one taken at the ISV.

**Supplementary Table S4:** Analysis of single factors and gut microbiome gross community measures (richness, evenness, diversity) for both MAAp neonates and infants.

| Factor                  |                    | Neonates             |       |                 |       |                   |       | Infants               |        |                  |       |                    |        |
|-------------------------|--------------------|----------------------|-------|-----------------|-------|-------------------|-------|-----------------------|--------|------------------|-------|--------------------|--------|
|                         |                    | Richness             |       | Evenness        |       | Diversity         |       | Richness              |        | Evenness         |       | Diversity          |        |
|                         |                    | N, Mean (SD)         | P*    | N, Mean (SD)    | P     | N, Mean (SD)      | P     | N, Mean (SD)          | P      | N, Mean (SD)     | P     | N, Mean (SD)       | P      |
| <b>Demographics</b>     |                    |                      |       |                 |       |                   |       |                       |        |                  |       |                    |        |
| Maternal race-ethnicity | Caucasian          | 31, 972.94 (389.87)  | 0.061 | 31, 0.35 (0.08) | 0.047 | 31, 50.86 (16.2)  | 0.027 | 48, 1418.44 (664.11)  | <0.001 | 48, 0.39 (0.1)   | 0.001 | 48, 69.65 (23.46)  | <0.001 |
|                         | Afr Amer           | 82, 1027.59 (424.67) |       | 82, 0.37 (0.07) |       | 82, 53.72 (17.36) |       | 100, 1892.09 (684.26) |        | 100, 0.45 (0.08) |       | 100, 88.26 (24.18) |        |
|                         | Hispanic           | 8, 925.5 (617.25)    |       | 8, 0.34 (0.14)  |       | 8, 49.49 (24.86)  |       | 6, 1854.33 (946.77)   |        | 6, 0.45 (0.09)   |       | 6, 84.91 (35.16)   |        |
|                         | Arab Am            | 5, 1020.6 (695.37)   |       | 5, 0.34 (0.13)  |       | 5, 54.65 (22.09)  |       | 9, 1243.33 (516.84)   |        | 9, 0.38 (0.07)   |       | 9, 63.45 (18.82)   |        |
|                         | Other              | 4, 541 (175.28)      |       | 4, 0.26 (0.04)  |       | 4, 30.34 (5.67)   |       | 5, 1594 (693.91)      |        | 5, 0.39 (0.08)   |       | 5, 72.45 (20.49)   |        |
| Marital status          | Married            | 75, 891.05 (390.39)  | 0.001 | 75, 0.34 (0.08) | 0.001 | 75, 47.66 (16.06) | 0.001 | 114, 1559.57 (643.1)  | 0.001  | 114, 0.41 (0.09) | 0.013 | 114, 75.74 (23.4)  | 0.001  |
|                         | Divorced/Separated | 6, 835.83 (143.12)   |       | 6, 0.35 (0.06)  |       | 6, 47.36 (7.2)    |       | 6, 1774 (891.82)      |        | 6, 0.46 (0.07)   |       | 6, 84.15 (32.73)   |        |
|                         | Widowed            | 0, NA (NA)           |       | 0, NA (NA)      |       | 0, NA (NA)        |       | 1, 1497 (NA)          |        | 1, 0.44 (NA)     |       | 1, 75.74 (NA)      |        |
|                         | Never Married      | 49, 1168.37 (479.01) |       | 49, 0.39 (0.07) |       | 49, 59.46 (18.98) |       | 47, 2077.62 (744)     |        | 47, 0.46 (0.08)  |       | 47, 93.56 (26.07)  |        |
| Urban residence         | No                 | 59, 911.95 (376.01)  | 0.073 | 59, 0.34 (0.08) | 0.006 | 59, 48.93 (15.47) | 0.096 | 85, 1574.79 (634.64)  | 0.021  | 85, 0.41 (0.09)  | 0.015 | 85, 75.82 (23.42)  | 0.013  |
|                         | Yes                | 71, 1060.41 (476.88) |       | 71, 0.37 (0.07) |       | 71, 54.72 (19.26) |       | 83, 1852.08 (765.99)  |        | 83, 0.44 (0.09)  |       | 83, 86.35 (26.69)  |        |
| Household income        | <20K               | 16, 1013.81 (327.77) | 0.12  | 16, 0.37 (0.06) | 0.061 | 16, 53.91 (12.48) | 0.28  | 18, 1693.72 (552.98)  | 0.49   | 18, 0.44 (0.06)  | 0.19  | 18, 80.27 (18.53)  | 0.34   |
|                         | 20-<40K            | 29, 1136.17 (472.32) |       | 29, 0.38 (0.06) |       | 29, 57.59 (19.41) |       | 32, 1856.28 (806.1)   |        | 32, 0.45 (0.08)  |       | 32, 87.46 (29.51)  |        |
|                         | 40-<80K            | 31, 912.81 (508.04)  |       | 31, 0.33 (0.09) |       | 31, 49.36 (20.24) |       | 40, 1697.4 (693.82)   |        | 40, 0.43 (0.09)  |       | 40, 80.58 (25.51)  |        |
|                         | 80-<100K           | 16, 1064.19 (402.43) |       | 16, 0.37 (0.08) |       | 16, 53.91 (17.74) |       | 30, 1578 (717.44)     |        | 30, 0.41 (0.1)   |       | 30, 75.51 (25.04)  |        |
|                         | >=100K             | 21, 950.74 (369.11)  |       | 21, 0.36 (0.08) |       | 21, 50.17 (15.98) |       | 22, 1559.04 (630.51)  |        | 22, 0.39 (0.09)  |       | 22, 75.04 (22.49)  |        |
| Maternal education      | Some HS            | 5, 901 (475.6)       | 0.067 | 5, 0.37 (0.07)  | 0.173 | 5, 48.15 (21.92)  | 0.013 | 7, 1449.57 (915.14)   | 0.003  | 7, 0.41 (0.1)    | 0.028 | 7, 71.41 (37.52)   | 0.001  |
|                         | HS or equiv        | 23, 1118.65 (439.96) |       | 23, 0.37 (0.08) |       | 23, 58.16 (15.74) |       | 21, 1941.86 (732.04)  |        | 21, 0.45 (0.08)  |       | 21, 89.18 (26.37)  |        |
|                         | Some College       | 60, 1041.45 (474.97) |       | 60, 0.36 (0.09) |       | 60, 54.15 (19.23) |       | 79, 1848.32 (685.47)  |        | 79, 0.44 (0.08)  |       | 79, 86.77 (23.49)  |        |
|                         | Bachelors or more  | 42, 866.02 (353.79)  |       | 42, 0.34 (0.08) |       | 42, 46.3 (14.93)  |       | 61, 1485.85 (665.87)  |        | 61, 0.4 (0.1)    |       | 61, 71.88 (23.8)   |        |
| Maternal age †          | ---                | 130, -0.17           | 0.047 | 130, -0.13      | 0.126 | 130, -0.16        | 0.061 | 168, -0.1             | 0.218  | 168, -0.06       | 0.448 | 168, -0.08         | 0.304  |
| Paternal age †          | ---                | 118, -0.15           | 0.11  | 118, -0.13      | 0.17  | 118, -0.15        | 0.101 | 153, -0.02            | 0.784  | 153, 0           | 0.967 | 153, -0.01         | 0.919  |



|                                          |                 | Neonates              |       |                  |       |                    |       | Infants               |       |                  |       |                    |       |
|------------------------------------------|-----------------|-----------------------|-------|------------------|-------|--------------------|-------|-----------------------|-------|------------------|-------|--------------------|-------|
| Factor                                   |                 | Richness              |       | Evenness         |       | Diversity          |       | Richness              |       | Evenness         |       | Diversity          |       |
|                                          |                 | N, Mean (SD)          | P*    | N, Mean (SD)     | P     | N, Mean (SD)       | P     | N, Mean (SD)          | P     | N, Mean (SD)     | P     | N, Mean (SD)       | P     |
| <b>Pregnancy and Delivery</b>            |                 |                       |       |                  |       |                    |       |                       |       |                  |       |                    |       |
| Mode of delivery (c-section vs. vaginal) | Vaginal         | 89, 1016.43 (482.13)  | 0.739 | 89, 0.36 (0.08)  | 0.11  | 89, 53.85 (19.58)  | 0.216 | 94, 1653.02 (743.17)  | 0.192 | 94, 0.42 (0.09)  | 0.332 | 94, 79.22 (26.9)   | 0.306 |
|                                          | C-Section       | 41, 942.24 (324.77)   |       | 41, 0.34 (0.07)  |       | 41, 48.27 (12.57)  |       | 74, 1786.43 (673.11)  |       | 74, 0.43 (0.08)  |       | 74, 83.31 (23.74)  |       |
| Mode of delivery (type)                  | Vaginal         | 89, 1016.43 (482.13)  | 0.927 | 89, 0.36 (0.08)  | 0.263 | 89, 53.85 (19.58)  | 0.45  | 94, 1653.02 (743.17)  | 0.247 | 94, 0.42 (0.09)  | 0.231 | 94, 79.22 (26.9)   | 0.289 |
|                                          | Planned Csect   | 17, 939.65 (288.5)    |       | 17, 0.34 (0.08)  |       | 17, 48.07 (11.19)  |       | 32, 1903.47 (717.41)  |       | 32, 0.45 (0.07)  |       | 32, 87.96 (25.23)  |       |
|                                          | Unplanned Csect | 24, 944.08 (354.3)    |       | 24, 0.34 (0.07)  |       | 24, 48.42 (13.7)   |       | 42, 1697.26 (631.44)  |       | 42, 0.42 (0.08)  |       | 42, 79.77 (22.18)  |       |
| Firstborn                                | No              | 85, 1042.29 (448.76)  | 0.062 | 85, 0.36 (0.08)  | 0.434 | 85, 54.53 (17.7)   | 0.013 | 92, 1700.67 (685.53)  | 0.911 | 92, 0.42 (0.09)  | 0.978 | 92, 81.2 (24.58)   | 0.622 |
|                                          | Yes             | 45, 899.98 (407.78)   |       | 45, 0.35 (0.08)  |       | 45, 47.49 (17.28)  |       | 76, 1725.24 (751.74)  |       | 76, 0.43 (0.08)  |       | 76, 80.82 (26.87)  |       |
| Parity†                                  | ---             | 130, 0.12             | 0.158 | 130, 0.04        | 0.652 | 130, 0.19          | 0.032 | 168, -0.04            | 0.603 | 168, -0.05       | 0.496 | 168, 0             | 0.959 |
| Number of previous pregnancies           | 0               | 29, 794.62 (236.18)   | 0.045 | 29, 0.33 (0.08)  | 0.316 | 29, 43.46 (11.63)  | 0.016 | 47, 1628.68 (720.7)   | 0.197 | 47, 0.42 (0.09)  | 0.197 | 47, 77.14 (24.43)  | 0.217 |
|                                          | 1               | 30, 1059.13 (407.2)   |       | 30, 0.36 (0.09)  |       | 30, 54.83 (17)     |       | 40, 1785.28 (758.7)   |       | 40, 0.43 (0.09)  |       | 40, 83.04 (28.84)  |       |
|                                          | 2               | 31, 970.87 (499.16)   |       | 31, 0.36 (0.08)  |       | 31, 51.64 (19.71)  |       | 40, 1784.78 (753.5)   |       | 40, 0.43 (0.09)  |       | 40, 83.68 (26.34)  |       |
|                                          | 3               | 22, 1090.82 (497.94)  |       | 22, 0.36 (0.09)  |       | 22, 55.59 (19.82)  |       | 22, 1855.09 (613.16)  |       | 22, 0.45 (0.07)  |       | 22, 87.75 (20.42)  |       |
|                                          | 4 or more       | 18, 1121.17 (484.04)  |       | 18, 0.38 (0.06)  |       | 18, 57.93 (18.09)  |       | 19, 1443.05 (587.7)   |       | 19, 0.39 (0.1)   |       | 19, 73.03 (23.64)  |       |
| Baby gender                              | Male            | 71, 975.61 (385.46)   | 0.89  | 71, 0.35 (0.08)  | 0.607 | 71, 51.76 (16.5)   | 0.826 | 86, 1791 (734.12)     | 0.109 | 86, 0.43 (0.09)  | 0.543 | 86, 83.46 (26.39)  | 0.141 |
|                                          | Female          | 59, 1014 (497.94)     |       | 59, 0.36 (0.08)  |       | 59, 52.49 (19.41)  |       | 82, 1628.71 (687.27)  |       | 82, 0.42 (0.08)  |       | 82, 78.48 (24.57)  |       |
| Maternal antibiotic use during pregnancy | No              | 57, 1004.44 (523.15)  | 0.559 | 57, 0.35 (0.09)  | 0.772 | 57, 52.4 (21.48)   | 0.379 | 72, 1629.43 (734.39)  | 0.167 | 72, 0.41 (0.09)  | 0.089 | 72, 77.79 (26.48)  | 0.191 |
|                                          | Yes             | 68, 982.97 (366.78)   |       | 68, 0.36 (0.07)  |       | 68, 51.8 (14.41)   |       | 85, 1761.36 (688.75)  |       | 85, 0.43 (0.09)  |       | 85, 82.87 (24.14)  |       |
| Maternal antifungal use during pregnancy | No              | 104, 1005.07 (446.66) | 0.44  | 104, 0.36 (0.08) | 0.59  | 104, 52.79 (18.22) | 0.343 | 121, 1633.14 (685.63) | 0.057 | 121, 0.41 (0.09) | 0.039 | 121, 77.87 (24.69) | 0.033 |
|                                          | Yes             | 21, 931.81 (430.74)   |       | 21, 0.35 (0.08)  |       | 21, 48.5 (16.21)   |       | 36, 1928.47 (755.68)  |       | 36, 0.45 (0.07)  |       | 36, 89.52 (25.52)  |       |

|                                     |           | Neonates              |        |                  |       |                    |       | Infants               |        |                  |        |                    |        |
|-------------------------------------|-----------|-----------------------|--------|------------------|-------|--------------------|-------|-----------------------|--------|------------------|--------|--------------------|--------|
| Factor                              |           | Richness              |        | Evenness         |       | Diversity          |       | Richness              |        | Evenness         |        | Diversity          |        |
|                                     |           | N, Mean (SD)          | P*     | N, Mean (SD)     | P     | N, Mean (SD)       | P     | N, Mean (SD)          | P      | N, Mean (SD)     | P      | N, Mean (SD)       | P      |
| BMI (first recorded in pregnancy) † | ---       | 124, 0.21             | 0.018  | 124, 0.08        | 0.403 | 124, 0.24          | 0.006 | 158, 0.23             | 0.003  | 158, 0.22        | 0.007  | 158, 0.25          | 0.002  |
| BMI (last recorded in pregnancy) †  | ---       | 124, 0.18             | 0.042  | 124, 0.06        | 0.53  | 124, 0.21          | 0.018 | 158, 0.23             | 0.003  | 158, 0.19        | 0.016  | 158, 0.24          | 0.002  |
| Birth weight z-score †              | ---       | 124, -0.02            | 0.815  | 124, -0.08       | 0.384 | 124, -0.02         | 0.833 | 158, 0.01             | 0.933  | 158, -0.02       | 0.85   | 158, -0.01         | 0.949  |
| Gestational age †                   | ---       | 130, -0.19            | 0.027  | 130, -0.23       | 0.009 | 130, -0.19         | 0.031 | 165, -0.06            | 0.465  | 165, -0.13       | 0.087  | 165, -0.06         | 0.434  |
| Season of birth                     | Winter    | 36, 972.86 (400.81)   | 0.355  | 36, 0.36 (0.08)  | 0.861 | 36, 51.47 (17.78)  | 0.492 | 21, 1739.19 (786.35)  | 0.873  | 21, 0.43 (0.09)  | 0.946  | 21, 81.77 (30.27)  | 0.925  |
|                                     | Spring    | 29, 928.86 (430.15)   |        | 29, 0.35 (0.09)  |       | 29, 49.73 (16.1)   |       | 39, 1700.67 (640.98)  |        | 39, 0.42 (0.07)  |        | 39, 80.83 (22.9)   |        |
|                                     | Summer    | 31, 952.84 (396.39)   |        | 31, 0.35 (0.08)  |       | 31, 50.53 (16.2)   |       | 52, 1742.6 (694.15)   |        | 52, 0.43 (0.1)   |        | 52, 81.6 (25.75)   |        |
|                                     | Fall      | 34, 1105.76 (513.32)  |        | 34, 0.37 (0.08)  |       | 34, 56.19 (20.52)  |       | 56, 1680.64 (768.68)  |        | 56, 0.42 (0.09)  |        | 56, 80.35 (25.94)  |        |
| Baby race-ethnicity                 | Caucasian | 25, 922.84 (343.8)    | 0.144  | 25, 0.34 (0.08)  | 0.185 | 25, 49.4 (15.47)   | 0.07  | 40, 1364.2 (637.81)   | <0.001 | 40, 0.38 (0.1)   | <0.001 | 40, 67.84 (23.13)  | <0.001 |
|                                     | Afr Amer  | 83, 1029.52 (424.13)  |        | 83, 0.37 (0.07)  |       | 83, 53.77 (17.32)  |       | 102, 1898.33 (688.36) |        | 102, 0.45 (0.08) |        | 102, 88.36 (24.29) |        |
|                                     | Hispanic  | 11, 1053.09 (634.91)  |        | 11, 0.34 (0.13)  |       | 11, 53.5 (24.71)   |       | 9, 1649.44 (831.58)   |        | 9, 0.44 (0.08)   |        | 9, 78.01 (29.89)   |        |
|                                     | Arab Am   | 5, 1020.6 (695.37)    |        | 5, 0.34 (0.13)   |       | 5, 54.65 (22.09)   |       | 12, 1286 (470.09)     |        | 12, 0.38 (0.06)  |        | 12, 64.51 (17.22)  |        |
|                                     | Other     | 6, 647.67 (238.25)    |        | 6, 0.32 (0.07)   |       | 6, 35.43 (8.89)    |       | 5, 1821 (842.14)      |        | 5, 0.43 (0.1)    |        | 5, 81.91 (24.97)   |        |
| Mom smoked during pregnancy         | No        | 117, 984.32 (445.8)   | 0.235  | 117, 0.35 (0.08) | 0.156 | 117, 51.87 (18.19) | 0.406 | 152, 1704.15 (709.06) | 0.742  | 152, 0.42 (0.09) | 0.128  | 152, 80.88 (25.28) | 0.827  |
|                                     | Yes       | 13, 1071.46 (374.92)  |        | 13, 0.39 (0.06)  |       | 13, 54.05 (14.4)   |       | 16, 1784.31 (781.58)  |        | 16, 0.45 (0.08)  |        | 16, 82.38 (28.98)  |        |
| <b>Feeding Practices – NSV</b>      |           |                       |        |                  |       |                    |       |                       |        |                  |        |                    |        |
| Ever breastfed                      | No        | 29, 1202.41 (415.34)  | <0.001 | 29, 0.39 (0.06)  | 0.009 | 29, 61.06 (17.75)  | 0.001 | 37, 1962.95 (740.59)  | 0.011  | 37, 0.44 (0.1)   | 0.177  | 37, 91.07 (26.65)  | 0.003  |
|                                     | Yes       | 101, 932.91 (428.51)  |        | 101, 0.35 (0.08) |       | 101, 49.52 (17.06) |       | 129, 1630.65 (672.15) |        | 129, 0.42 (0.08) |        | 129, 77.86 (24.12) |        |
| Exclusive breastfed                 | No        | 114, 1032.75 (448.13) | 0.002  | 114, 0.37 (0.07) | 0.005 | 114, 53.82 (18.11) | 0.001 | 131, 1825.56 (692.84) | <0.001 | 131, 0.44 (0.08) | <0.001 | 131, 85.13 (24.76) | <0.001 |
|                                     | Yes       | 16, 710.06 (212.12)   |        | 16, 0.29 (0.11)  |       | 16, 39.76 (8.48)   |       | 30, 1195.17 (535.27)  |        | 30, 0.36 (0.09)  |        | 30, 62.5 (20.68)   |        |

|                                       |     | Neonates             |        |                  |        |                    |        | Infants               |        |                  |        |                    |        |
|---------------------------------------|-----|----------------------|--------|------------------|--------|--------------------|--------|-----------------------|--------|------------------|--------|--------------------|--------|
|                                       |     | Richness             |        | Evenness         |        | Diversity          |        | Richness              |        | Evenness         |        | Diversity          |        |
| Factor                                |     | N, Mean (SD)         | P*     | N, Mean (SD)     | P      | N, Mean (SD)       | P      | N, Mean (SD)          | P      | N, Mean (SD)     | P      | N, Mean (SD)       | P      |
| Current breastfeeding                 | No  | 60, 1196.02 (488.81) | <0.001 | 60, 0.39 (0.07)  | <0.001 | 60, 60.45 (19.37)  | <0.001 | 70, 1929.91 (700.42)  | <0.001 | 70, 0.45 (0.08)  | 0.002  | 70, 89.02 (25.15)  | <0.001 |
|                                       | Yes | 70, 819.04 (298.32)  |        | 70, 0.32 (0.08)  |        | 70, 44.92 (12.62)  |        | 91, 1537.46 (670.56)  |        | 91, 0.4 (0.09)   |        | 91, 74.68 (24.23)  |        |
| Duration of breastfeeding †           | --- | 130, -0.27           | 0.002  | 130, -0.24       | 0.007  | 130, -0.26         | 0.003  | 160, -0.24            | 0.003  | 160, -0.17       | 0.028  | 160, -0.25         | 0.001  |
| Baby had water                        | No  | 97, 950.09 (455.33)  | 0.005  | 97, 0.35 (0.08)  | 0.034  | 97, 50.33 (18.61)  | 0.007  | 132, 1667.84 (707.26) | 0.119  | 132, 0.42 (0.09) | 0.173  | 132, 79.32 (25.62) | 0.106  |
|                                       | Yes | 33, 1119.24 (363.21) |        | 33, 0.38 (0.06)  |        | 33, 57.27 (14.22)  |        | 29, 1891.31 (699.43)  |        | 29, 0.45 (0.07)  |        | 29, 88.18 (24.44)  |        |
| Baby had antibiotic(s)                | No  | 112, 981.53 (432.1)  | 0.048  | 112, 0.35 (0.08) | 0.022  | 112, 51.74 (17.78) | 0.112  | 85, 1791.13 (691.93)  | 0.398  | 85, 0.43 (0.09)  | 0.324  | 85, 83.99 (24.62)  | 0.408  |
|                                       | Yes | 3, 1444.33 (312.74)  |        | 3, 0.46 (0.05)   |        | 3, 66.45 (11)      |        | 5, 1532 (935.46)      |        | 5, 0.39 (0.1)    |        | 5, 75.09 (37.12)   |        |
| <b>Feeding Practices – ISV</b>        |     |                      |        |                  |        |                    |        |                       |        |                  |        |                    |        |
| Exclusive breastfed                   | No  |                      |        |                  |        |                    |        | 152, 1797.18 (691.59) | <0.001 | 152, 0.44 (0.08) | <0.001 | 152, 84.08 (24.61) | <0.001 |
|                                       | Yes |                      |        |                  |        |                    |        | 16, 900.56 (295.92)   |        | 16, 0.32 (0.07)  |        | 16, 51.97 (13.53)  |        |
| Current breastfeeding                 | No  |                      |        |                  |        |                    |        | 122, 1905.52 (698.9)  | <0.001 | 122, 0.45 (0.08) | <0.001 | 122, 88 (24.35)    | <0.001 |
|                                       | Yes |                      |        |                  |        |                    |        | 46, 1197.96 (455.75)  |        | 46, 0.36 (0.08)  |        | 46, 62.52 (18.67)  |        |
| Duration of breastfeeding †           | --- |                      |        |                  |        |                    |        | 157, -0.4             | <0.001 | 157, -0.34       | <0.001 | 157, -0.41         | <0.001 |
| Baby had water                        | No  |                      |        |                  |        |                    |        | 53, 1550.38 (653.86)  | 0.054  | 53, 0.41 (0.09)  | 0.044  | 53, 74.63 (23.87)  | 0.036  |
|                                       | Yes |                      |        |                  |        |                    |        | 115, 1786.17 (731.05) |        | 115, 0.43 (0.09) |        | 115, 83.97 (25.88) |        |
| Baby had antibiotic(s)                | No  |                      |        |                  |        |                    |        | 102, 1799.41 (734.64) | 0.304  | 102, 0.43 (0.09) | 0.684  | 102, 84.41 (25.6)  | 0.188  |
|                                       | Yes |                      |        |                  |        |                    |        | 29, 1621.59 (702.87)  |        | 29, 0.42 (0.09)  |        | 29, 76.89 (25.42)  |        |
| Early solid food (<4 months of age)   | No  |                      |        |                  |        |                    |        | 97, 1680.91 (711.76)  | 0.462  | 97, 0.42 (0.09)  | 0.357  | 97, 79.94 (25.45)  | 0.48   |
|                                       | Yes |                      |        |                  |        |                    |        | 71, 1753.97 (720.34)  |        | 71, 0.43 (0.09)  |        | 71, 82.5 (25.82)   |        |
| <b>Environment – during pregnancy</b> |     |                      |        |                  |        |                    |        |                       |        |                  |        |                    |        |

|                                     |          | Neonates             |       |                  |       |                    |       | Infants               |       |                  |       |                    |       |
|-------------------------------------|----------|----------------------|-------|------------------|-------|--------------------|-------|-----------------------|-------|------------------|-------|--------------------|-------|
|                                     |          | Richness             |       | Evenness         |       | Diversity          |       | Richness              |       | Evenness         |       | Diversity          |       |
| Factor                              |          | N, Mean (SD)         | P*    | N, Mean (SD)     | P     | N, Mean (SD)       | P     | N, Mean (SD)          | P     | N, Mean (SD)     | P     | N, Mean (SD)       | P     |
| Indoor pet(s) during pregnancy      | Neither  | 81, 1014.14 (479.35) | 0.613 | 81, 0.36 (0.08)  | 0.042 | 81, 53.01 (19.08)  | 0.48  | 106, 1775.41 (748.91) | 0.343 | 106, 0.43 (0.09) | 0.21  | 106, 83.1 (26.59)  | 0.317 |
|                                     | Dog only | 31, 930.65 (410.4)   |       | 31, 0.33 (0.08)  |       | 31, 48.94 (17.28)  |       | 33, 1729.82 (684.7)   |       | 33, 0.44 (0.08)  |       | 33, 82.71 (24.59)  |       |
|                                     | Cat only | 13, 1033.77 (294.11) |       | 13, 0.38 (0.06)  |       | 13, 54.86 (12.82)  |       | 14, 1471.43 (466.83)  |       | 14, 0.4 (0.06)   |       | 14, 73.47 (18.4)   |       |
|                                     | Both     | 5, 932 (199.48)      |       | 5, 0.39 (0.05)   |       | 5, 49.49 (9.29)    |       | 15, 1446.87 (662.68)  |       | 15, 0.4 (0.09)   |       | 15, 69.71 (23.71)  |       |
| ETS during pregnancy                | No       | 97, 951.89 (448.33)  | 0.011 | 97, 0.35 (0.09)  | 0.029 | 97, 50.32 (18.29)  | 0.007 | 125, 1656.92 (672.68) | 0.135 | 125, 0.42 (0.08) | 0.031 | 125, 79.5 (24.35)  | 0.213 |
|                                     | Yes      | 33, 1113.97 (390.76) |       | 33, 0.38 (0.06)  |       | 33, 57.29 (15.42)  |       | 43, 1871.28 (810.56)  |       | 43, 0.45 (0.09)  |       | 43, 85.47 (28.65)  |       |
| <b>Environment – NSV</b>            |          |                      |       |                  |       |                    |       |                       |       |                  |       |                    |       |
| Indoor pet(s)                       | Neither  | 86, 1012.47 (481.27) | 0.639 | 86, 0.36 (0.09)  | 0.052 | 86, 53.15 (19.47)  | 0.553 | 111, 1767.97 (725.76) | 0.181 | 111, 0.43 (0.09) | 0.114 | 111, 82.83 (26.25) | 0.149 |
|                                     | Dog only | 28, 923.79 (378.58)  |       | 28, 0.33 (0.07)  |       | 28, 48 (14.65)     |       | 27, 1698.11 (691.42)  |       | 27, 0.43 (0.08)  |       | 27, 81.86 (24.21)  |       |
|                                     | Cat only | 10, 1005.9 (284.53)  |       | 10, 0.38 (0.06)  |       | 10, 53.49 (12.55)  |       | 12, 1534.5 (454.49)   |       | 12, 0.41 (0.06)  |       | 12, 76.08 (17.48)  |       |
|                                     | Both     | 6, 1016.17 (272.65)  |       | 6, 0.39 (0.05)   |       | 6, 53.71 (13.25)   |       | 11, 1317.73 (730.23)  |       | 11, 0.37 (0.1)   |       | 11, 64.5 (25.52)   |       |
| ETS                                 | No       | 106, 970.41 (454.02) | 0.045 | 106, 0.35 (0.08) | 0.215 | 106, 50.9 (18.2)   | 0.02  | 135, 1706.9 (714.89)  | 0.701 | 135, 0.42 (0.09) | 0.863 | 135, 80.83 (25.57) | 0.593 |
|                                     | Yes      | 24, 1092.96 (354.54) |       | 24, 0.37 (0.06)  |       | 24, 57.36 (15.19)  |       | 26, 1714.27 (690.76)  |       | 26, 0.42 (0.1)   |       | 26, 81.34 (26.06)  |       |
| Mom smoked                          | No       | 116, 993.44 (457.25) | 0.424 | 116, 0.35 (0.08) | 0.208 | 116, 52.12 (18.49) | 0.478 | 149, 1702.93 (724.67) | 0.535 | 149, 0.42 (0.09) | 0.27  | 149, 80.75 (26.11) | 0.591 |
|                                     | Yes      | 14, 989.64 (245.68)  |       | 14, 0.38 (0.04)  |       | 14, 51.82 (11.05)  |       | 12, 1772.17 (489.67)  |       | 12, 0.45 (0.06)  |       | 12, 82.92 (18.15)  |       |
| Endotoxin - Mother's mattress†      | ---      | 123, -0.05           | 0.615 | 123, -0.04       | 0.684 | 123, -0.04         | 0.688 | 152, -0.08            | 0.336 | 152, -0.02       | 0.825 | 152, -0.08         | 0.347 |
| Endotoxin - Mother's bedroom floor† | ---      | 125, 0.18            | 0.05  | 125, 0.18        | 0.049 | 125, 0.19          | 0.037 | 149, -0.11            | 0.177 | 149, -0.04       | 0.664 | 149, -0.1          | 0.244 |
| Endotoxin - Baby's mattress†        | ---      | 127, 0.02            | 0.836 | 127, -0.04       | 0.626 | 127, 0.04          | 0.632 | 154, 0.05             | 0.559 | 154, 0.11        | 0.177 | 154, 0.06          | 0.477 |
| Endotoxin - Baby's bedroom floor†   | ---      | 126, 0.21            | 0.021 | 126, 0.18        | 0.047 | 126, 0.23          | 0.01  | 152, -0.04            | 0.649 | 152, 0           | 0.993 | 152, -0.02         | 0.79  |

| Factor                               |           | Neonates             |       |                  |       |                    |       | Infants               |       |                  |       |                    |        |
|--------------------------------------|-----------|----------------------|-------|------------------|-------|--------------------|-------|-----------------------|-------|------------------|-------|--------------------|--------|
|                                      |           | Richness             |       | Evenness         |       | Diversity          |       | Richness              |       | Evenness         |       | Diversity          |        |
|                                      |           | N, Mean (SD)         | P*    | N, Mean (SD)     | P     | N, Mean (SD)       | P     | N, Mean (SD)          | P     | N, Mean (SD)     | P     | N, Mean (SD)       | P      |
| Endotoxin - living room floor †      | ---       | 126, 0.04            | 0.672 | 126, 0.03        | 0.736 | 126, 0.05          | 0.56  | 155, -0.02            | 0.847 | 155, -0.01       | 0.865 | 155, -0.01         | 0.937  |
| Detectable Can f 1                   | No        | 47, 923.02 (401.8)   | 0.142 | 47, 0.35 (0.08)  | 0.709 | 47, 48.9 (16.22)   | 0.141 | 62, 1811.13 (695.77)  | 0.102 | 62, 0.44 (0.08)  | 0.151 | 62, 84.36 (24.91)  | 0.188  |
|                                      | Yes       | 79, 1038.3 (466.18)  |       | 79, 0.36 (0.08)  |       | 79, 53.97 (18.93)  |       | 94, 1639.12 (708.98)  |       | 94, 0.41 (0.09)  |       | 94, 78.61 (25.49)  |        |
| Detectable Fel d 1                   | No        | 44, 911.16 (326.11)  | 0.245 | 44, 0.34 (0.06)  | 0.132 | 44, 48.8 (14.37)   | 0.282 | 37, 1971.19 (788.63)  | 0.029 | 37, 0.45 (0.08)  | 0.079 | 37, 91.04 (28.59)  | 0.023  |
|                                      | Yes       | 83, 1040.19 (490.37) |       | 83, 0.36 (0.09)  |       | 83, 53.86 (19.51)  |       | 117, 1626.4 (666.81)  |       | 117, 0.41 (0.09) |       | 117, 77.8 (23.68)  |        |
| Detectable Der f 1                   | No        | 87, 959.18 (403.16)  | 0.33  | 87, 0.35 (0.08)  | 0.037 | 87, 50.74 (16.76)  | 0.296 | 97, 1660.38 (730.76)  | 0.163 | 97, 0.42 (0.09)  | 0.474 | 97, 79.33 (26.13)  | 0.165  |
|                                      | Yes       | 40, 1074.45 (517.08) |       | 40, 0.38 (0.09)  |       | 40, 55.07 (20.34)  |       | 58, 1786.28 (669.41)  |       | 58, 0.43 (0.1)   |       | 58, 83.57 (24.17)  |        |
| Regular attendance at daycare        | No        | 129, 993.96 (440.3)  | 0.915 | 129, 0.36 (0.08) | 0.23  | 129, 52.13 (17.87) | 0.936 | 157, 1703.51 (708.7)  | 0.565 | 157, 0.42 (0.09) | 0.425 | 157, 80.79 (25.57) | 0.716  |
|                                      | Yes       | 1, 873 (NA)          |       | 1, 0.27 (NA)     |       | 1, 47.54 (NA)      |       | 4, 1888 (801.89)      |       | 4, 0.46 (0.05)   |       | 4, 85.64 (28.72)   |        |
| Central air conditioner in residence | No        | 55, 1073.44 (421.36) | 0.018 | 55, 0.38 (0.07)  | 0.013 | 55, 55.16 (17.15)  | 0.037 | 64, 1862.59 (736.4)   | 0.043 | 64, 0.45 (0.07)  | 0.016 | 64, 86.31 (24.42)  | 0.048  |
|                                      | Yes       | 75, 934.07 (444.56)  |       | 75, 0.34 (0.09)  |       | 75, 49.84 (18.06)  |       | 97, 1606.15 (674.8)   |       | 97, 0.41 (0.09)  |       | 97, 77.35 (25.8)   |        |
| Clothes dryer in residence           | No        | 16, 1216.81 (363.5)  | 0.004 | 16, 0.41 (0.06)  | 0.001 | 16, 61.11 (16.19)  | 0.009 | 21, 1800.24 (693.61)  | 0.322 | 21, 0.44 (0.08)  | 0.471 | 21, 83.68 (25.97)  | 0.429  |
|                                      | Yes       | 114, 961.62 (440.57) |       | 114, 0.35 (0.08) |       | 114, 50.83 (17.72) |       | 140, 1694.27 (712.61) |       | 140, 0.42 (0.09) |       | 140, 80.5 (25.58)  |        |
| Use gas cooking stove                | No        | 44, 971.7 (494.36)   | 0.392 | 44, 0.35 (0.1)   | 0.725 | 44, 51.17 (19.99)  | 0.372 | 51, 1765.04 (668.66)  | 0.302 | 51, 0.43 (0.08)  | 0.326 | 51, 82.73 (24.8)   | 0.442  |
|                                      | Yes       | 86, 1003.94 (410.02) |       | 86, 0.36 (0.07)  |       | 86, 52.56 (16.69)  |       | 110, 1681.69 (728.3)  |       | 110, 0.42 (0.09) |       | 110, 80.07 (25.99) |        |
| Regular use of air filter            | No        | 65, 1036.68 (451.44) | 0.197 | 65, 0.36 (0.08)  | 0.177 | 65, 54.34 (18.26)  | 0.104 | 79, 1885.67 (700.21)  | 0.001 | 79, 0.44 (0.08)  | 0.001 | 79, 87.92 (24.9)   | <0.001 |
|                                      | Yes       | 63, 936.32 (415.78)  |       | 63, 0.35 (0.08)  |       | 63, 49.39 (16.88)  |       | 77, 1490.6 (642.02)   |       | 77, 0.4 (0.09)   |       | 77, 72.3 (23.26)   |        |
| Year residence built                 | =< 1950   | 50, 985.84 (396.57)  | 0.236 | 50, 0.36 (0.08)  | 0.053 | 50, 51.48 (15.96)  | 0.291 | 65, 1723.35 (757.68)  | 0.988 | 65, 0.42 (0.1)   | 0.799 | 65, 81.5 (27.56)   | 0.966  |
|                                      | 1950-1979 | 56, 1009.91 (444.83) |       | 56, 0.36 (0.07)  |       | 56, 52.96 (18.31)  |       | 67, 1698.67 (698.06)  |       | 67, 0.43 (0.08)  |       | 67, 80.88 (25.28)  |        |
|                                      | 1979-2012 | 20, 883 (445.74)     |       | 20, 0.32 (0.1)   |       | 20, 47.26 (17.05)  |       | 23, 1668.65 (652.59)  |       | 23, 0.41 (0.09)  |       | 23, 79.4 (23.04)   |        |
| <b>Environment – ISV</b>             |           |                      |       |                  |       |                    |       |                       |       |                  |       |                    |        |

|                                      |          | Neonates     |    |              |   |                       | Infants |                  |       |                    |       |              |   |
|--------------------------------------|----------|--------------|----|--------------|---|-----------------------|---------|------------------|-------|--------------------|-------|--------------|---|
|                                      |          | Richness     |    | Evenness     |   | Diversity             |         | Richness         |       | Evenness           |       | Diversity    |   |
| Factor                               |          | N, Mean (SD) | P* | N, Mean (SD) | P | N, Mean (SD)          | P       | N, Mean (SD)     | P     | N, Mean (SD)       | P     | N, Mean (SD) | P |
| Indoor pet(s)                        | Neither  |              |    |              |   | 120, 1760.62 (711.58) | 0.349   | 120, 0.43 (0.09) | 0.146 | 120, 82.66 (25.4)  | 0.337 |              |   |
|                                      | Dog only |              |    |              |   | 25, 1735.92 (788.66)  |         | 25, 0.44 (0.08)  |       | 25, 82.55 (27.99)  |       |              |   |
|                                      | Cat only |              |    |              |   | 12, 1432.33 (569.15)  |         | 12, 0.4 (0.07)   |       | 12, 72.17 (23.26)  |       |              |   |
|                                      | Both     |              |    |              |   | 10, 1454.3 (686.39)   |         | 10, 0.39 (0.1)   |       | 10, 69.58 (23.03)  |       |              |   |
| ETS                                  | No       |              |    |              |   | 139, 1708.65 (728.18) | 0.729   | 139, 0.42 (0.09) | 0.537 | 139, 80.94 (26.21) | 0.718 |              |   |
|                                      | Yes      |              |    |              |   | 29, 1726.83 (654.46)  |         | 29, 0.43 (0.09)  |       | 29, 81.45 (22.64)  |       |              |   |
| Endotoxin - Mother's mattress †      | ---      |              |    |              |   | 159, 0.1              | 0.195   | 159, 0.1         | 0.203 | 159, 0.09          | 0.257 |              |   |
| Endotoxin - Mother's bedroom floor † | ---      |              |    |              |   | 158, 0.18             | 0.021   | 158, 0.25        | 0.002 | 158, 0.19          | 0.018 |              |   |
| Endotoxin - Baby's mattress †        | ---      |              |    |              |   | 164, 0.09             | 0.251   | 164, 0.04        | 0.573 | 164, 0.1           | 0.21  |              |   |
| Endotoxin - Baby's bedroom floor †   | ---      |              |    |              |   | 161, 0.22             | 0.005   | 161, 0.26        | 0.001 | 161, 0.24          | 0.002 |              |   |
| Endotoxin - living room floor †      | ---      |              |    |              |   | 162, 0.17             | 0.032   | 162, 0.2         | 0.011 | 162, 0.16          | 0.039 |              |   |
| Mom smoked                           | No       |              |    |              |   | 153, 1711.29 (735.63) | 0.718   | 153, 0.42 (0.09) | 0.664 | 153, 80.91 (26.31) | 0.621 |              |   |
|                                      | Yes      |              |    |              |   | 15, 1716.8 (456.72)   |         | 15, 0.44 (0.06)  |       | 15, 82.16 (16.68)  |       |              |   |
| Detectable Can f 1                   | No       |              |    |              |   | 64, 1663.94 (645)     | 0.743   | 64, 0.41 (0.09)  | 0.219 | 64, 80.01 (24.46)  | 0.904 |              |   |
|                                      | Yes      |              |    |              |   | 102, 1757.36 (753.53) |         | 102, 0.43 (0.08) |       | 102, 82.17 (26.31) |       |              |   |
| Detectable Fel d 1                   | No       |              |    |              |   | 40, 1816.6 (818.15)   | 0.392   | 40, 0.44 (0.1)   | 0.298 | 40, 84.79 (30.65)  | 0.445 |              |   |
|                                      | Yes      |              |    |              |   | 127, 1684.91 (678.07) |         | 127, 0.42 (0.08) |       | 127, 80.02 (23.78) |       |              |   |
| Detectable Der f 1                   | No       |              |    |              |   | 90, 1721.59 (730.65)  | 0.954   | 90, 0.43 (0.08)  | 0.854 | 90, 81.44 (25.91)  | 0.958 |              |   |
|                                      | Yes      |              |    |              |   | 77, 1710.44 (698.18)  |         | 77, 0.42 (0.09)  |       | 77, 80.85 (25.35)  |       |              |   |

| Factor                               |           | Neonates             |       |                 |       |                   |       | Infants               |       |                  |        |                    |        |
|--------------------------------------|-----------|----------------------|-------|-----------------|-------|-------------------|-------|-----------------------|-------|------------------|--------|--------------------|--------|
|                                      |           | Richness             |       | Evenness        |       | Diversity         |       | Richness              |       | Evenness         |        | Diversity          |        |
|                                      |           | N, Mean (SD)         | P*    | N, Mean (SD)    | P     | N, Mean (SD)      | P     | N, Mean (SD)          | P     | N, Mean (SD)     | P      | N, Mean (SD)       | P      |
| Regular attendance at daycare        | No        |                      |       |                 |       |                   |       | 97, 1629.4 (742.59)   | 0.031 | 97, 0.41 (0.09)  | 0.032  | 97, 77.38 (26.19)  | 0.019  |
|                                      | Yes       |                      |       |                 |       |                   |       | 71, 1824.34 (662.02)  |       | 71, 0.44 (0.08)  |        | 71, 86 (23.97)     |        |
| Central air conditioner in residence | No        |                      |       |                 |       |                   |       | 69, 1842.14 (729.85)  | 0.056 | 69, 0.45 (0.07)  | 0.007  | 69, 86.43 (25.04)  | 0.029  |
|                                      | Yes       |                      |       |                 |       |                   |       | 99, 1620.93 (692.25)  |       | 99, 0.41 (0.09)  |        | 99, 77.26 (25.37)  |        |
| Clothes dryer in residence           | No        |                      |       |                 |       |                   |       | 23, 2010.61 (885.15)  | 0.09  | 23, 0.47 (0.08)  | 0.005  | 23, 90.14 (30.42)  | 0.139  |
|                                      | Yes       |                      |       |                 |       |                   |       | 144, 1663.01 (676.88) |       | 144, 0.42 (0.09) |        | 144, 79.5 (24.58)  |        |
| Use gas cooking stove                | No        |                      |       |                 |       |                   |       | 49, 1767.69 (721.49)  | 0.444 | 49, 0.43 (0.09)  | 0.772  | 49, 82.88 (26.08)  | 0.521  |
|                                      | Yes       |                      |       |                 |       |                   |       | 119, 1688.76 (712.91) |       | 119, 0.42 (0.09) |        | 119, 80.26 (25.42) |        |
| Regular use of air filter            | No        |                      |       |                 |       |                   |       | 82, 1838.91 (731.04)  | 0.018 | 82, 0.44 (0.08)  | 0.037  | 82, 85.96 (25.75)  | 0.012  |
|                                      | Yes       |                      |       |                 |       |                   |       | 79, 1555.73 (687.26)  |       | 79, 0.41 (0.09)  |        | 79, 74.96 (24.73)  |        |
| Year residence built                 | ≤ 1950    |                      |       |                 |       |                   |       | 44, 1724.8 (801.4)    | 0.573 | 44, 0.43 (0.09)  | 0.281  | 44, 81.01 (27.91)  | 0.507  |
|                                      | 1950-1979 |                      |       |                 |       |                   |       | 98, 1743.09 (711.84)  |       | 98, 0.43 (0.09)  |        | 98, 82.32 (25.95)  |        |
|                                      | 1979-2012 |                      |       |                 |       |                   |       | 17, 1536.88 (562.91)  |       | 17, 0.39 (0.09)  |        | 17, 75.02 (19.77)  |        |
| <b>Specimen Characteristics</b>      |           |                      |       |                 |       |                   |       |                       |       |                  |        |                    |        |
| Age at stool collection (days) †     | ---       | 130, 0.27            | 0.002 | 130, 0.21       | 0.019 | 130, 0.25         | 0.004 | 168, 0.25             | 0.001 | 168, 0.27        | <0.001 | 168, 0.27          | <0.001 |
| Season stool collected               | Winter    | 38, 1001.97 (469.08) | 0.04  | 38, 0.35 (0.09) | 0.182 | 38, 52.79 (19.49) | 0.08  | 47, 1733.96 (680.15)  | 0.869 | 47, 0.43 (0.09)  | 0.874  | 47, 82.21 (24.54)  | 0.788  |
|                                      | Spring    | 27, 876.56 (324.27)  |       | 27, 0.34 (0.08) |       | 27, 47.65 (13.72) |       | 59, 1684.41 (772.57)  |       | 59, 0.42 (0.1)   |        | 59, 79.78 (26.41)  |        |
|                                      | Summer    | 33, 914.85 (396.51)  |       | 33, 0.35 (0.08) |       | 33, 48.81 (15.51) |       | 32, 1754.5 (760.68)   |       | 32, 0.44 (0.08)  |        | 32, 82.54 (27.91)  |        |
|                                      | Fall      | 32, 1161.31 (490.08) |       | 32, 0.39 (0.07) |       | 32, 58.4 (19.75)  |       | 30, 1685.33 (621.23)  |       | 30, 0.42 (0.07)  |        | 30, 80.02 (23.91)  |        |

Abbreviations: BMI, body mass index; ETS, environmental tobacco smoke; NSV, neonatal study visit at 1-month of age; ISV, infant study visit at 6-months of age.

\*Wilcoxon Rank Sum or Kruskal-Wallis

† Spearman's correlation and corresponding p-value reported for continuous variables

**See Excel spreadsheet for Supplementary Table S5**
